# Supplementary material for: A concise synthesis of the potent inflammatory mediator 5-oxo-ETE
Source: Royal Society of Chemistry journal article supplement (doi:10.1039/c1md00231g), 2011-10-20

## Electronic Supplementary Information

### A Concise Synthesis of the Potent Inflammatory Mediator 5-oxo-ETE

Rahul Tyagi,<sup>†</sup> Steffi Blaettermann,<sup>‡</sup> Evi Kostenis,<sup>‡</sup> Trond Ulven\*,<sup>†</sup>

<sup>†</sup>*Department of Physics and Chemistry, University of Southern Denmark, Campusvej 55, DK-5230 Odense M, Denmark, and*

<sup>‡</sup>*Institute for Pharmaceutical Biology, University of Bonn, Nussallee 6, D-53115 Bonn, Germany*

*ulven@ifk.sdu.dk*

#### Contents

|                                                                              |     |
|------------------------------------------------------------------------------|-----|
| NMR spectra of <b>3</b> ( <sup>1</sup> H, <sup>13</sup> C, COSY, HSQC)       | S2  |
| NMR spectra of <b>4</b> ( <sup>1</sup> H, <sup>13</sup> C, COSY, HSQC)       | S6  |
| NMR spectra of <b>5</b> ( <sup>1</sup> H, <sup>13</sup> C, COSY, HSQC)       | S10 |
| NMR spectra of <b>1</b> ( <sup>1</sup> H, <sup>13</sup> C, COSY, HSQC, HMBC) | S14 |
| HPLC chromatogram of <b>1</b>                                                | S19 |

(3Z,6Z,9Z)-6-(1-iodopentadeca-3,6,9-trien-1-yl)tetrahydro-2H-pyran-2-one (3).

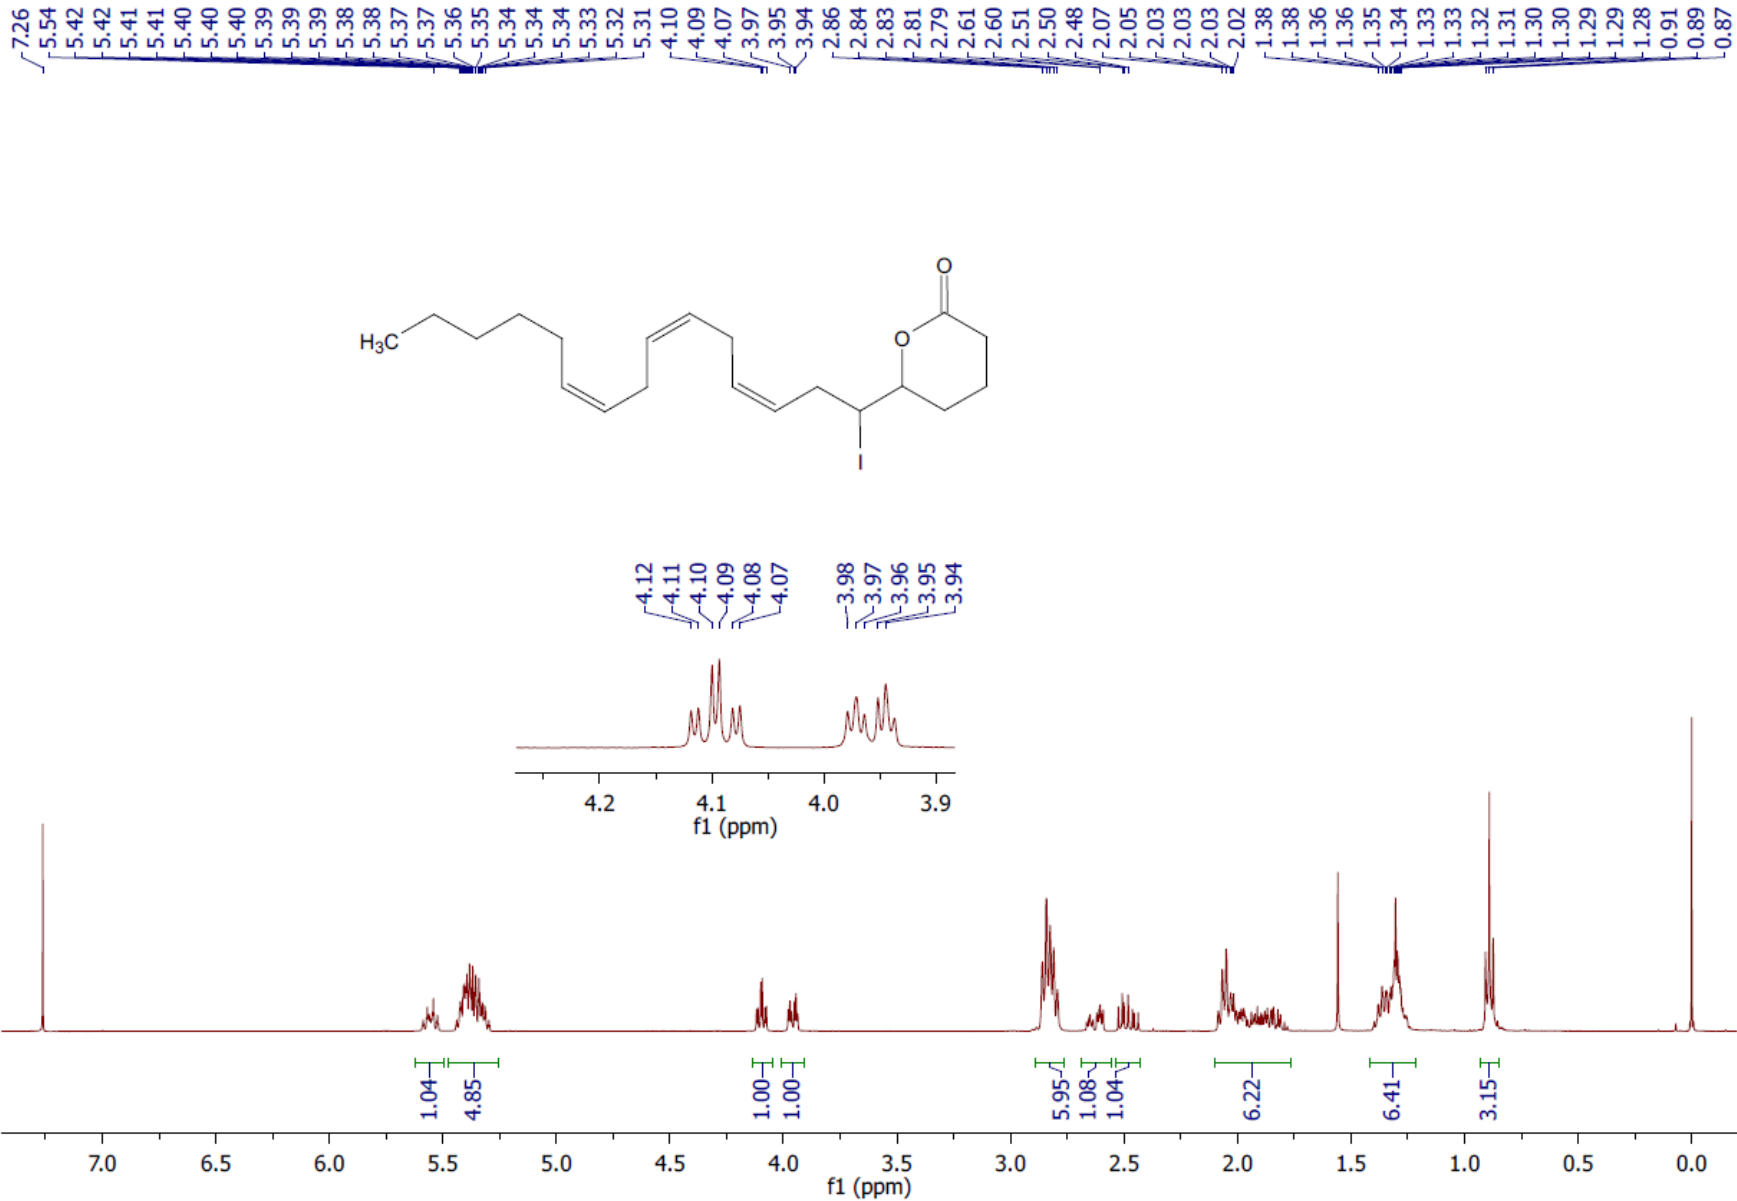

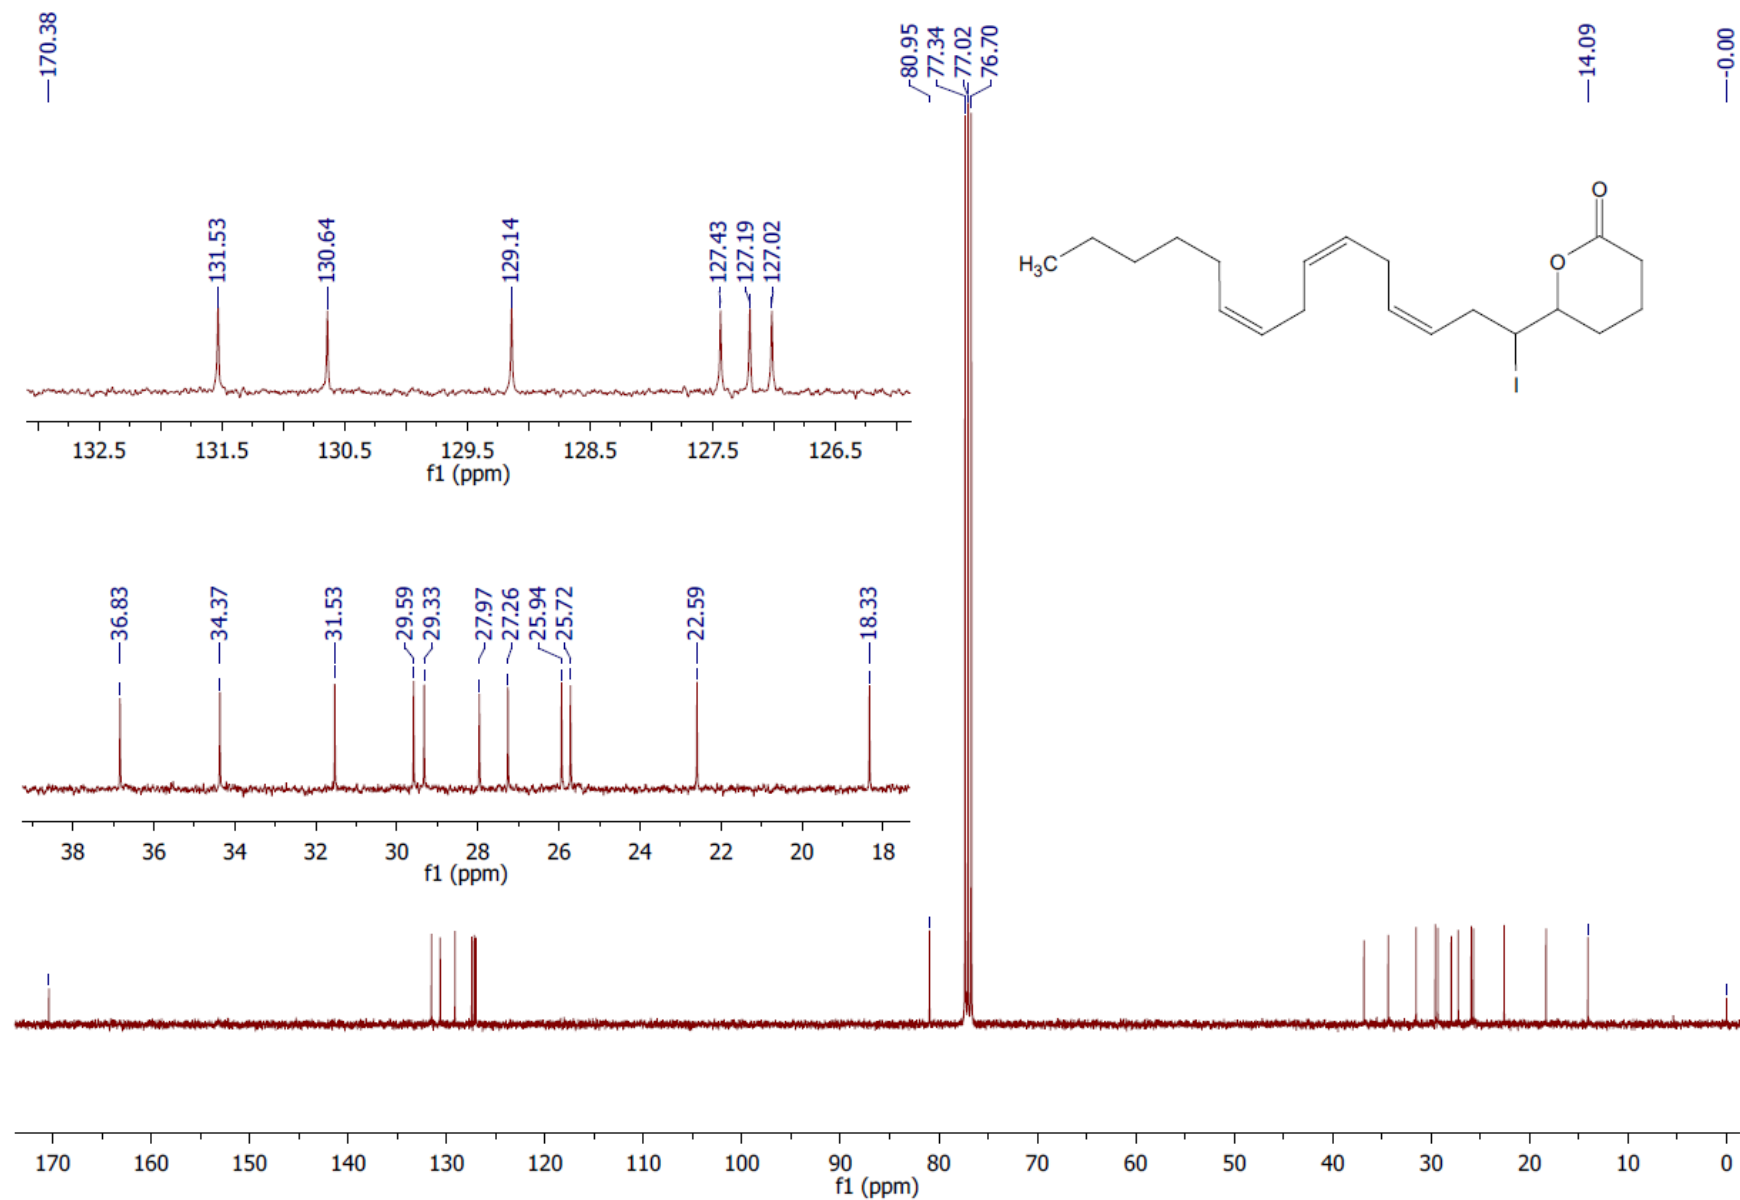

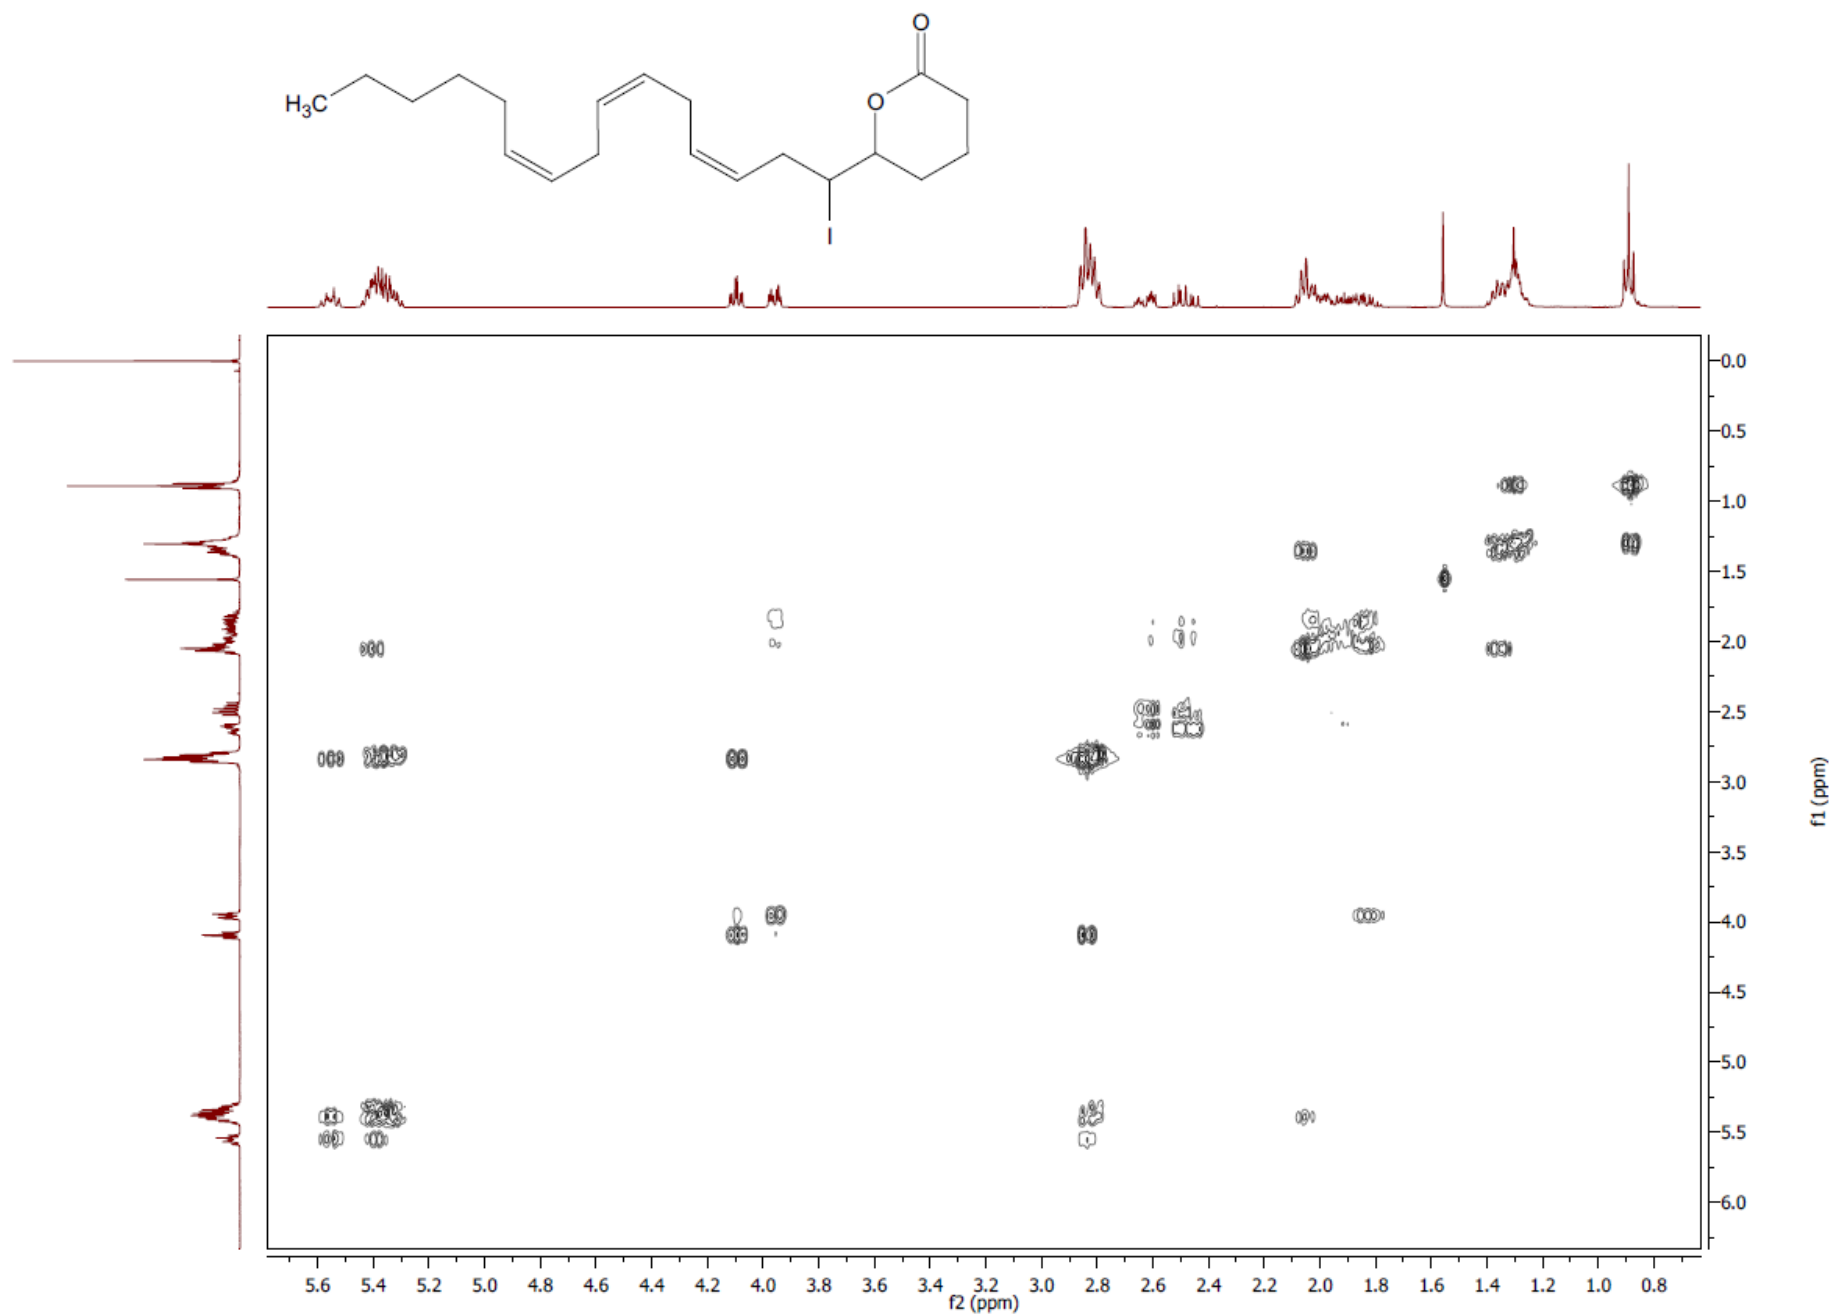

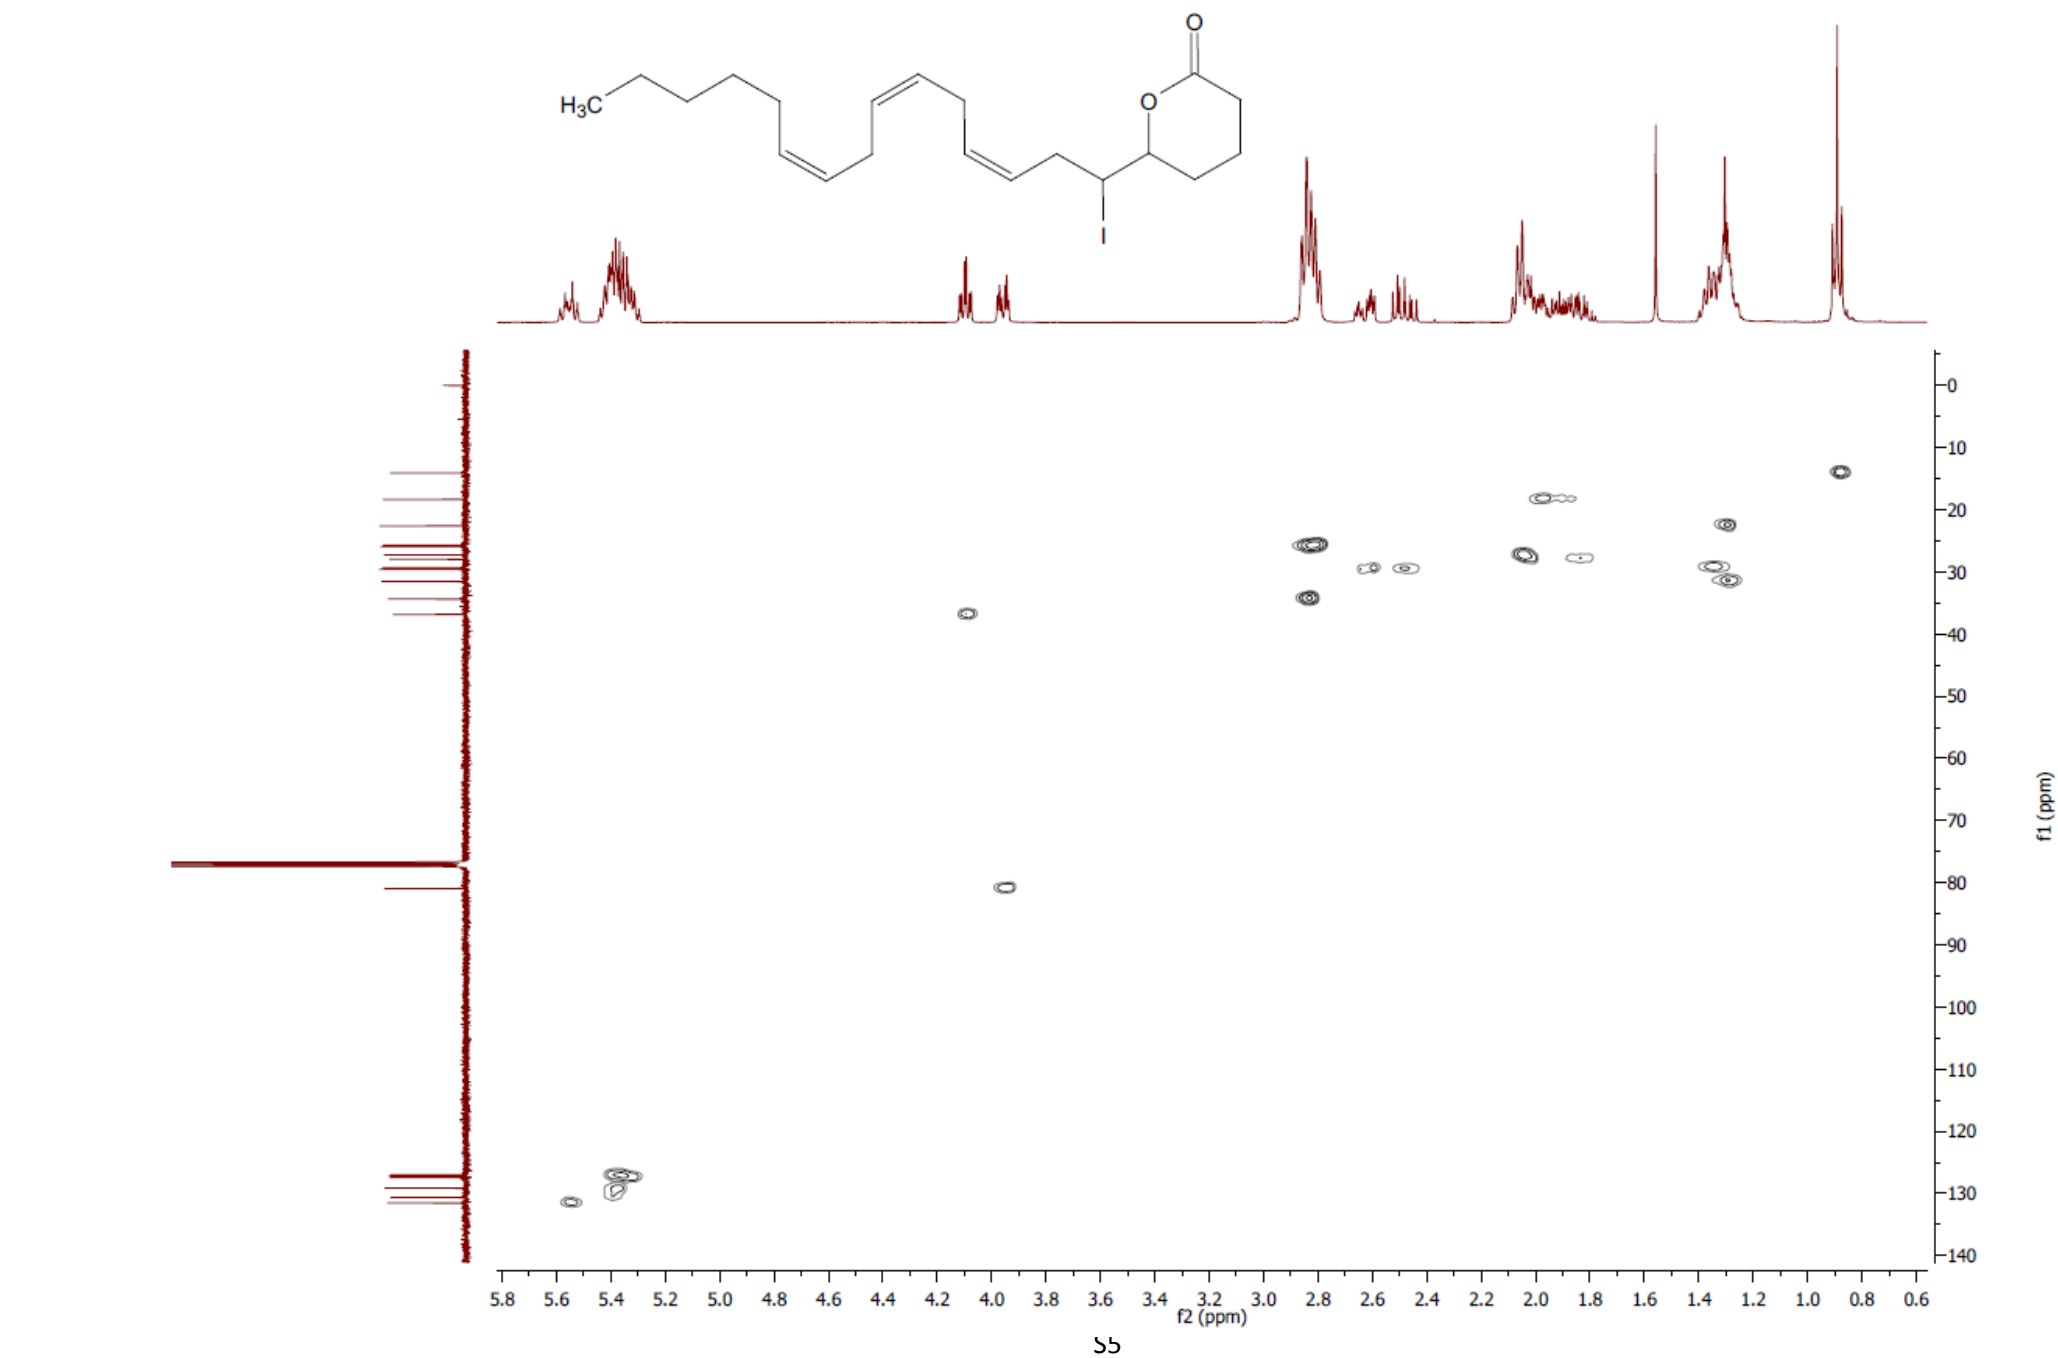

(1*E*,3*Z*,6*Z*,9*Z*)-6-(Pentadeca-1,3,6,9-tetraen-1-yl)tetrahydro-2*H*-pyran-2-one (4).

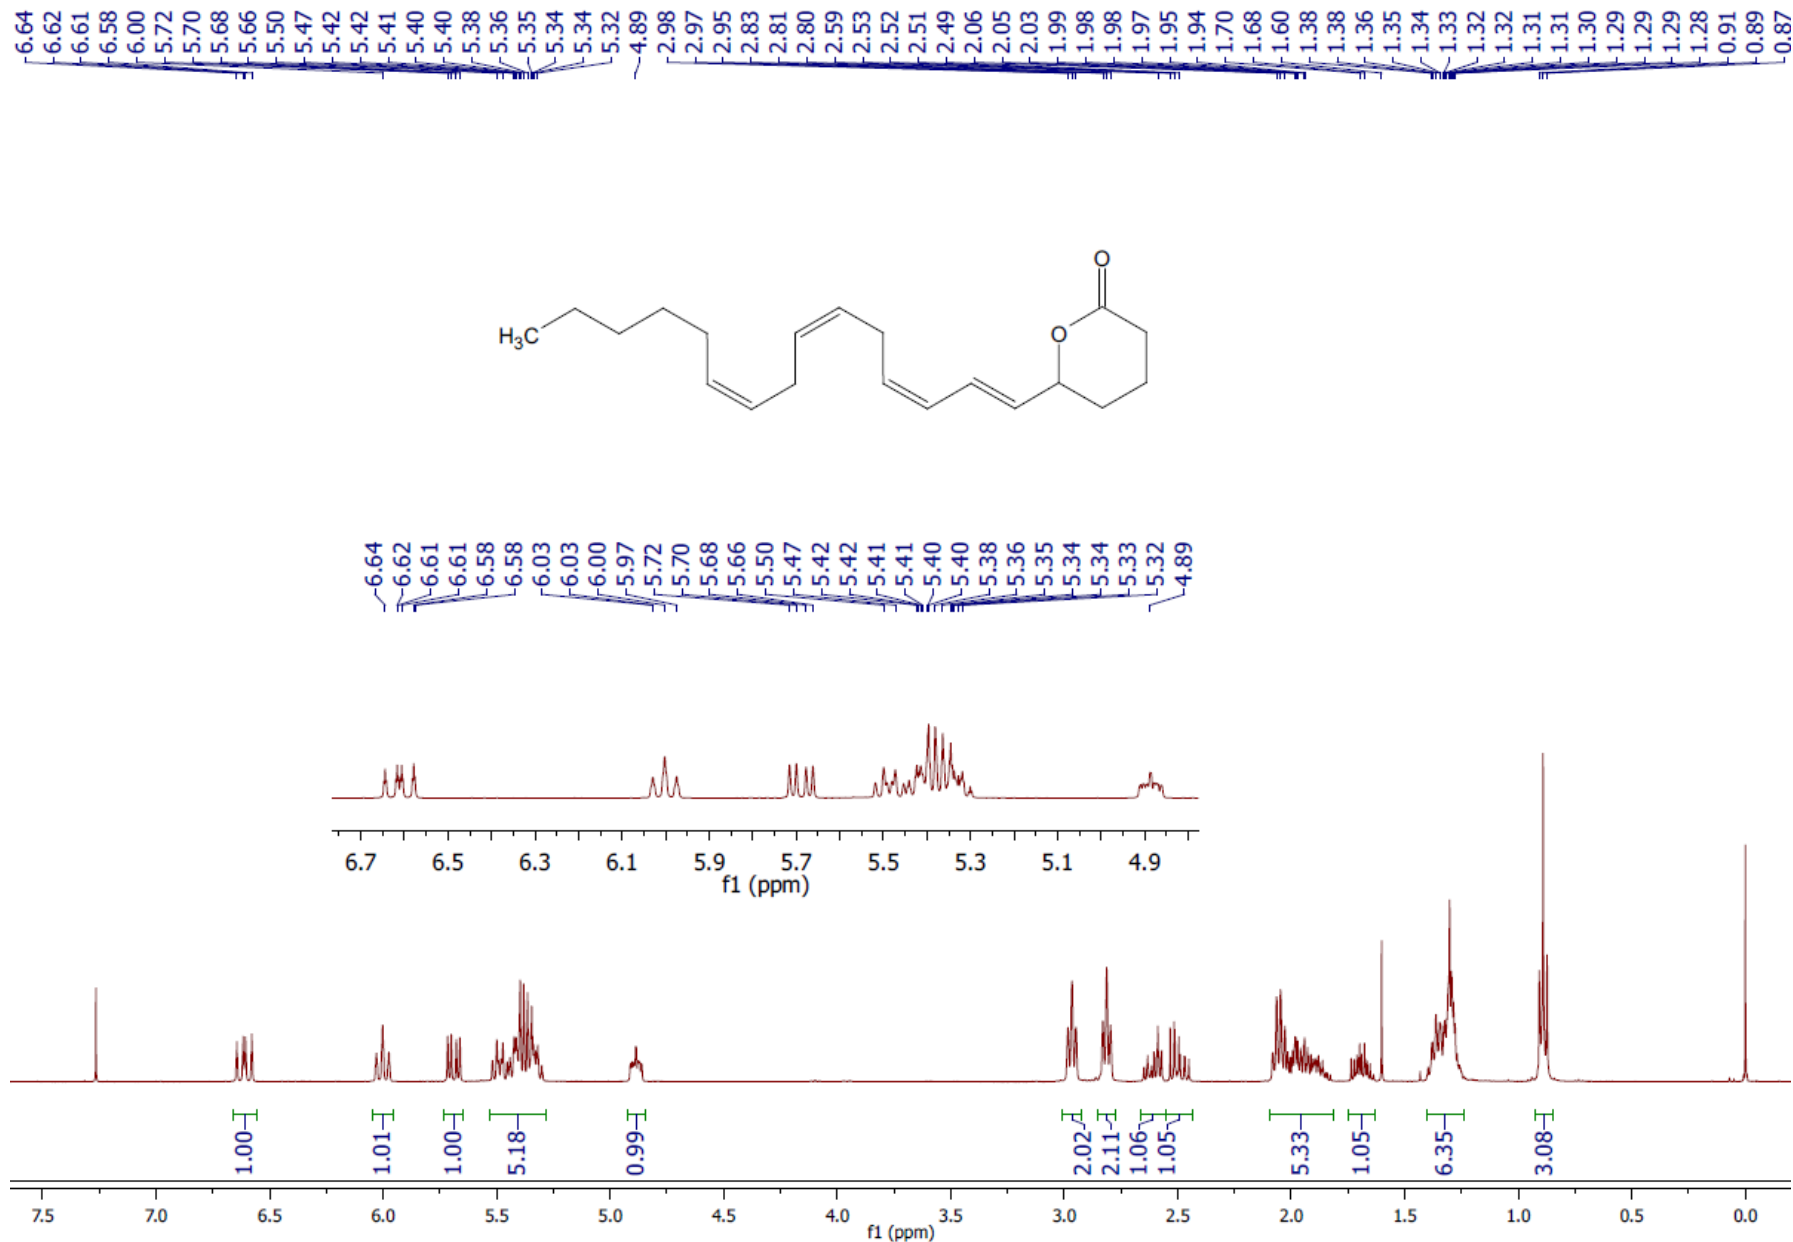

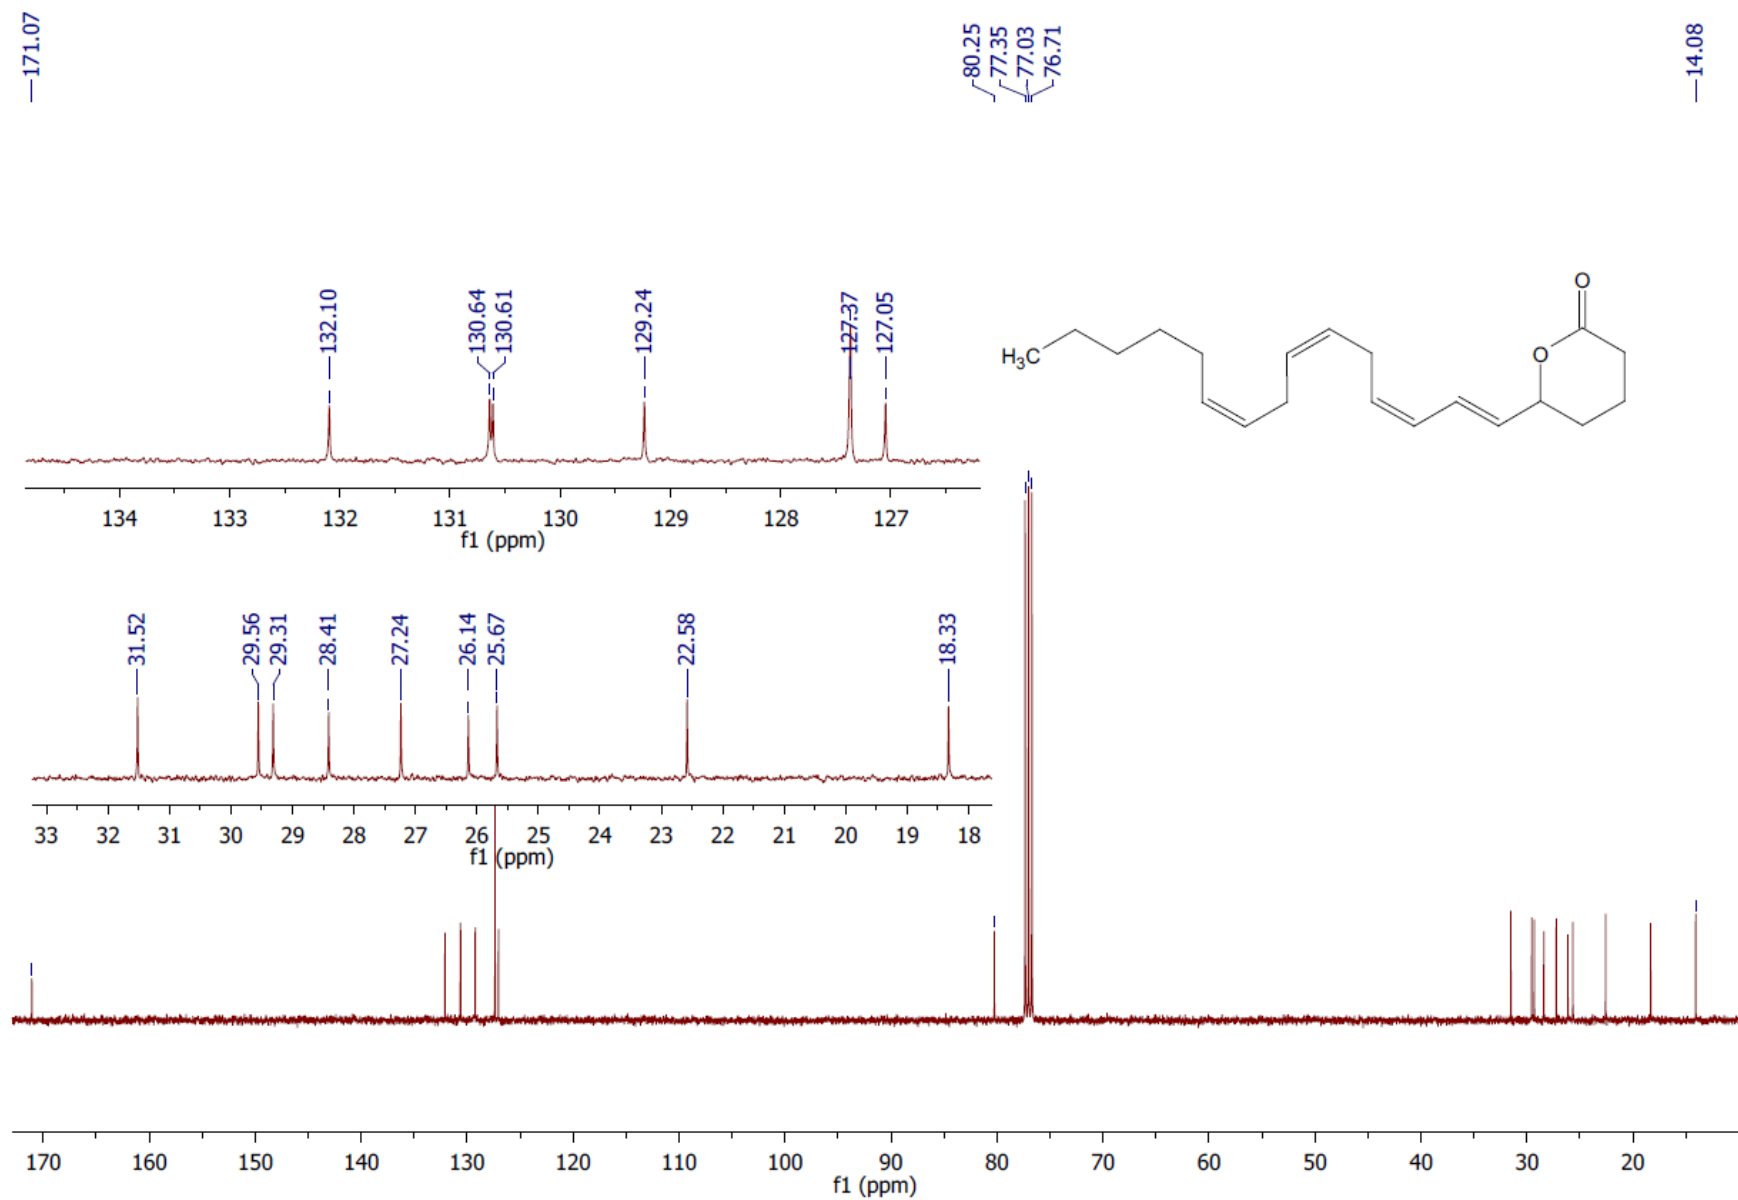

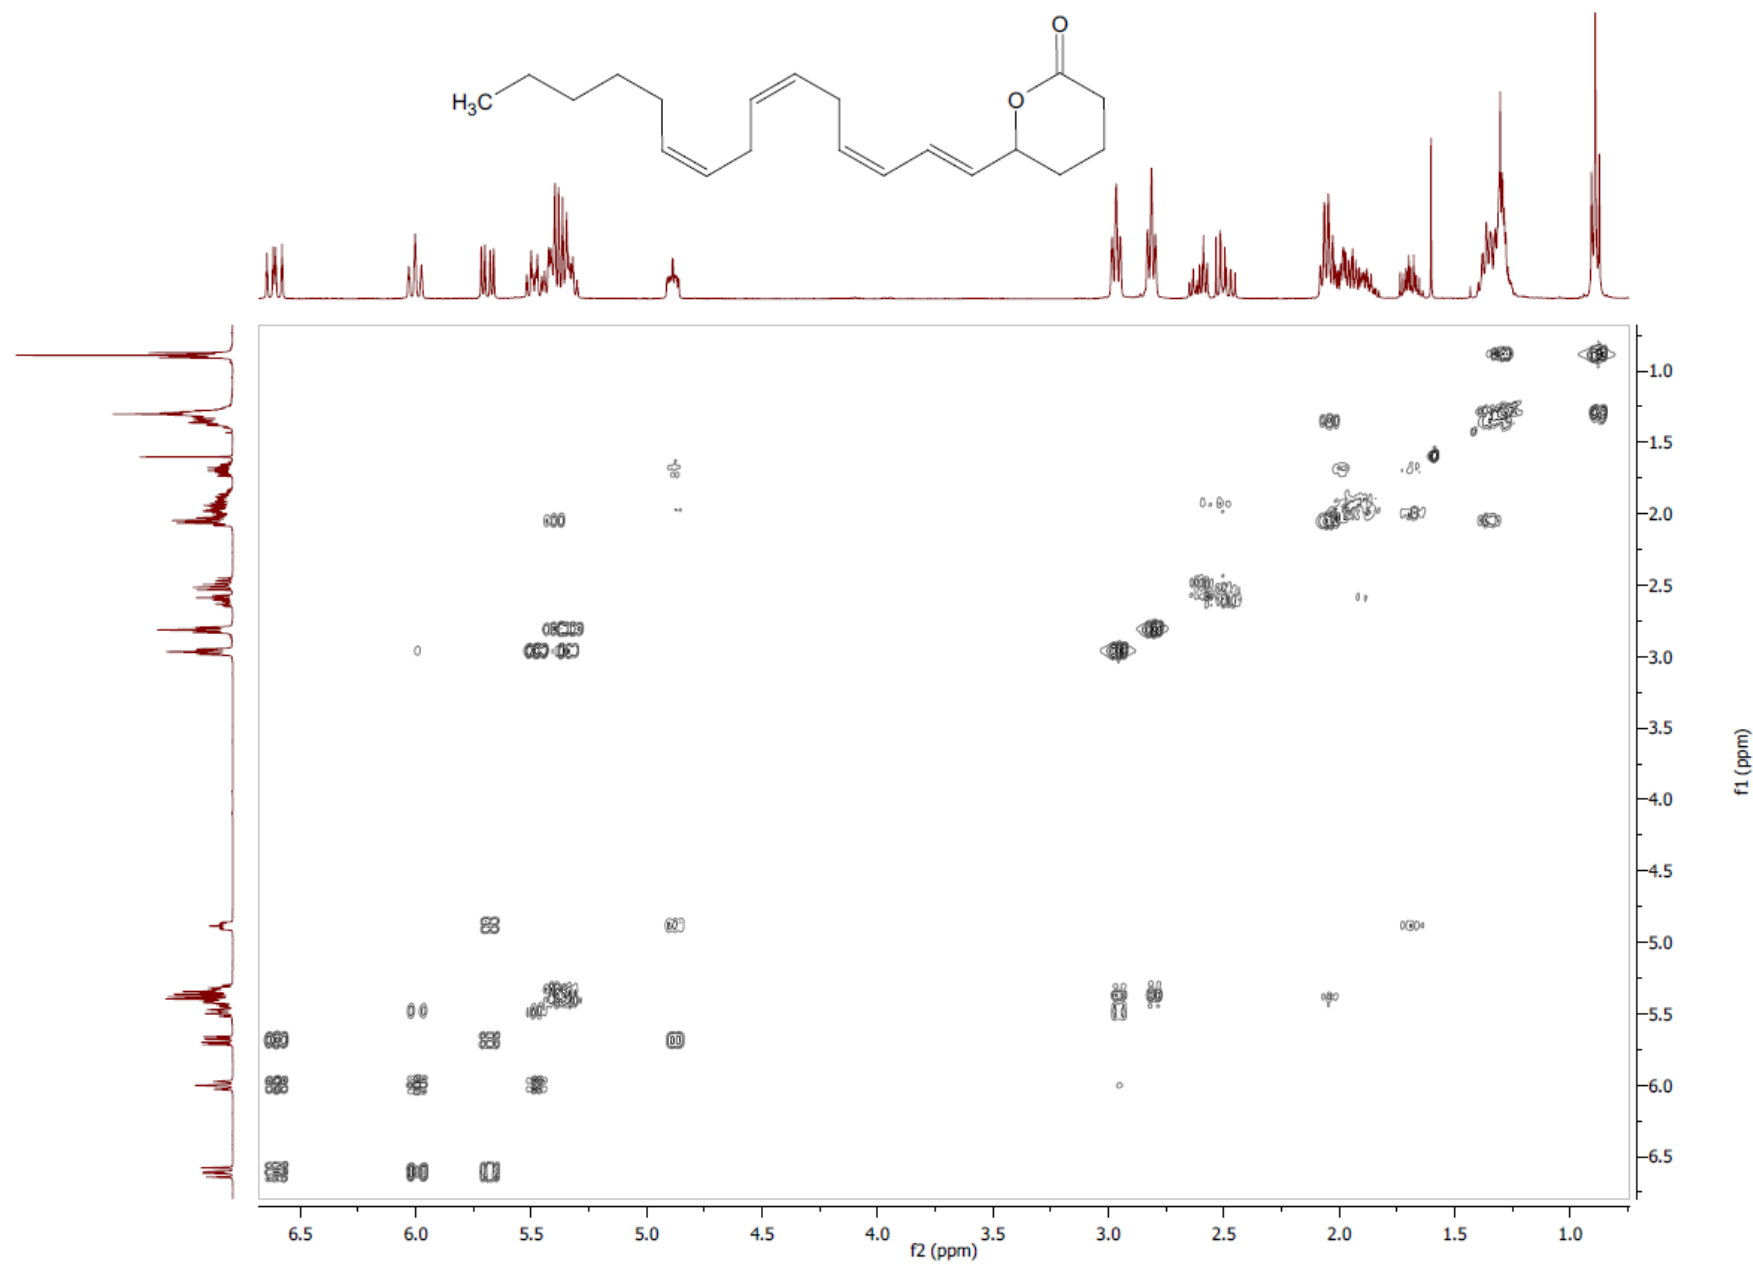



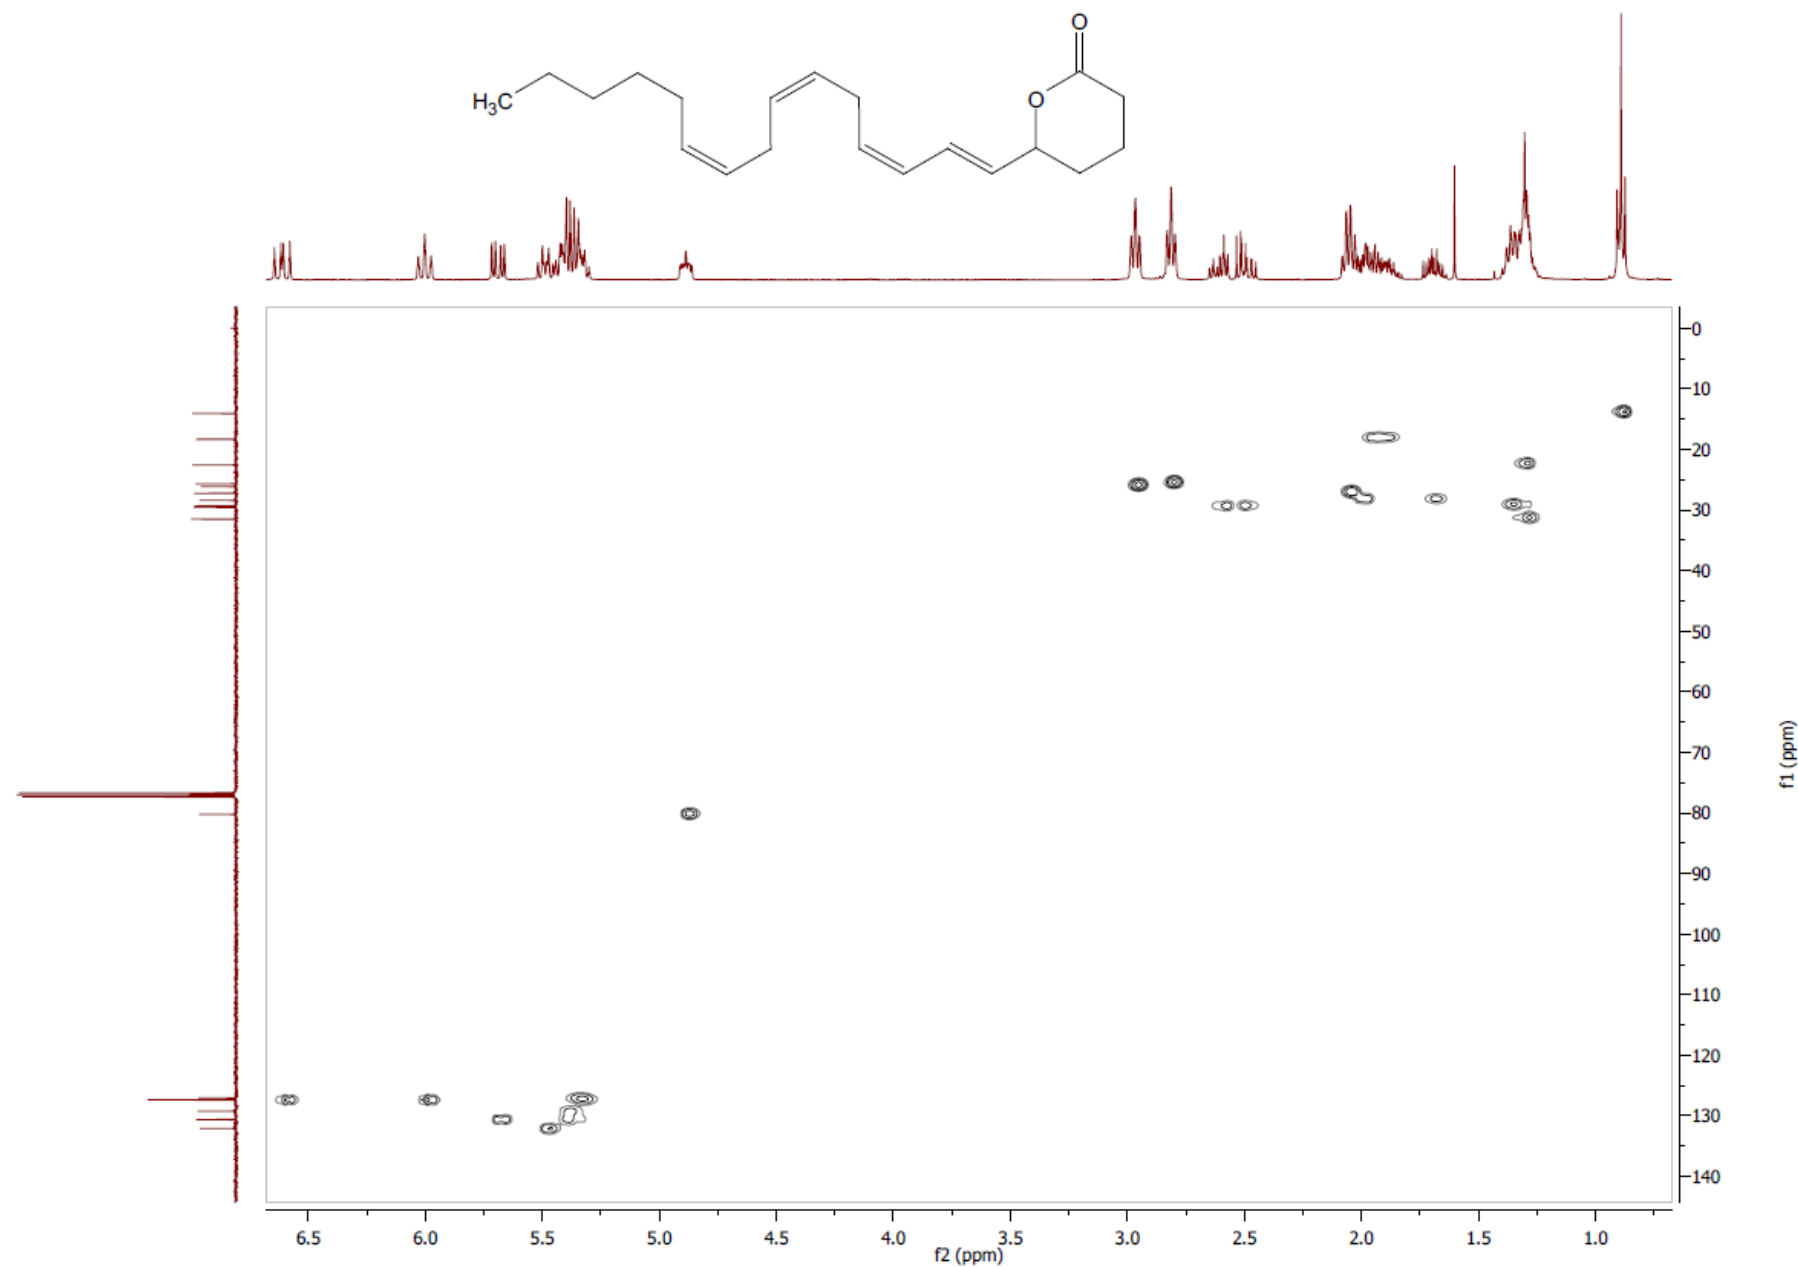

(6*E*,8*Z*,11*Z*,14*Z*)-5-Hydroxyicosa-6,8,11,14-tetraenoic acid (5-HETE, 5).

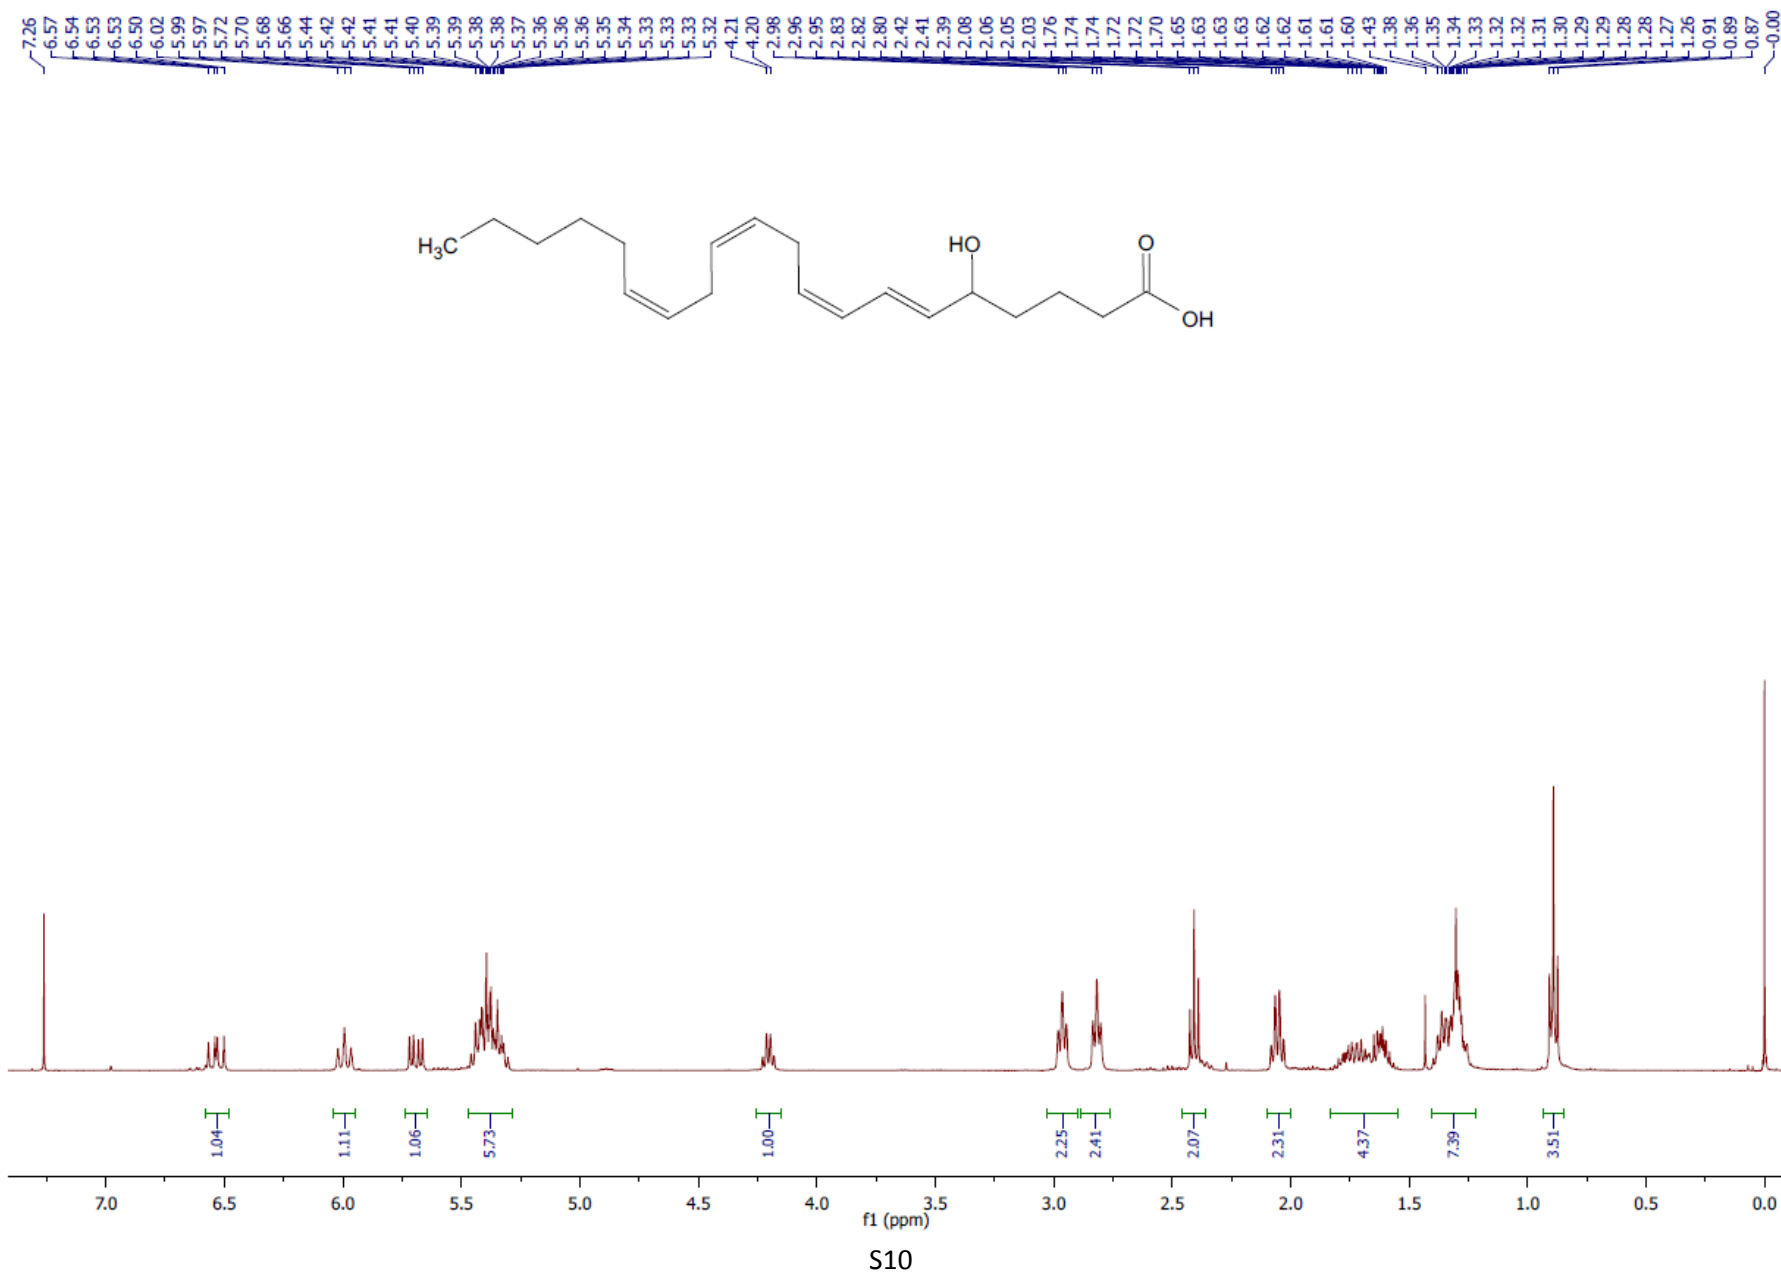

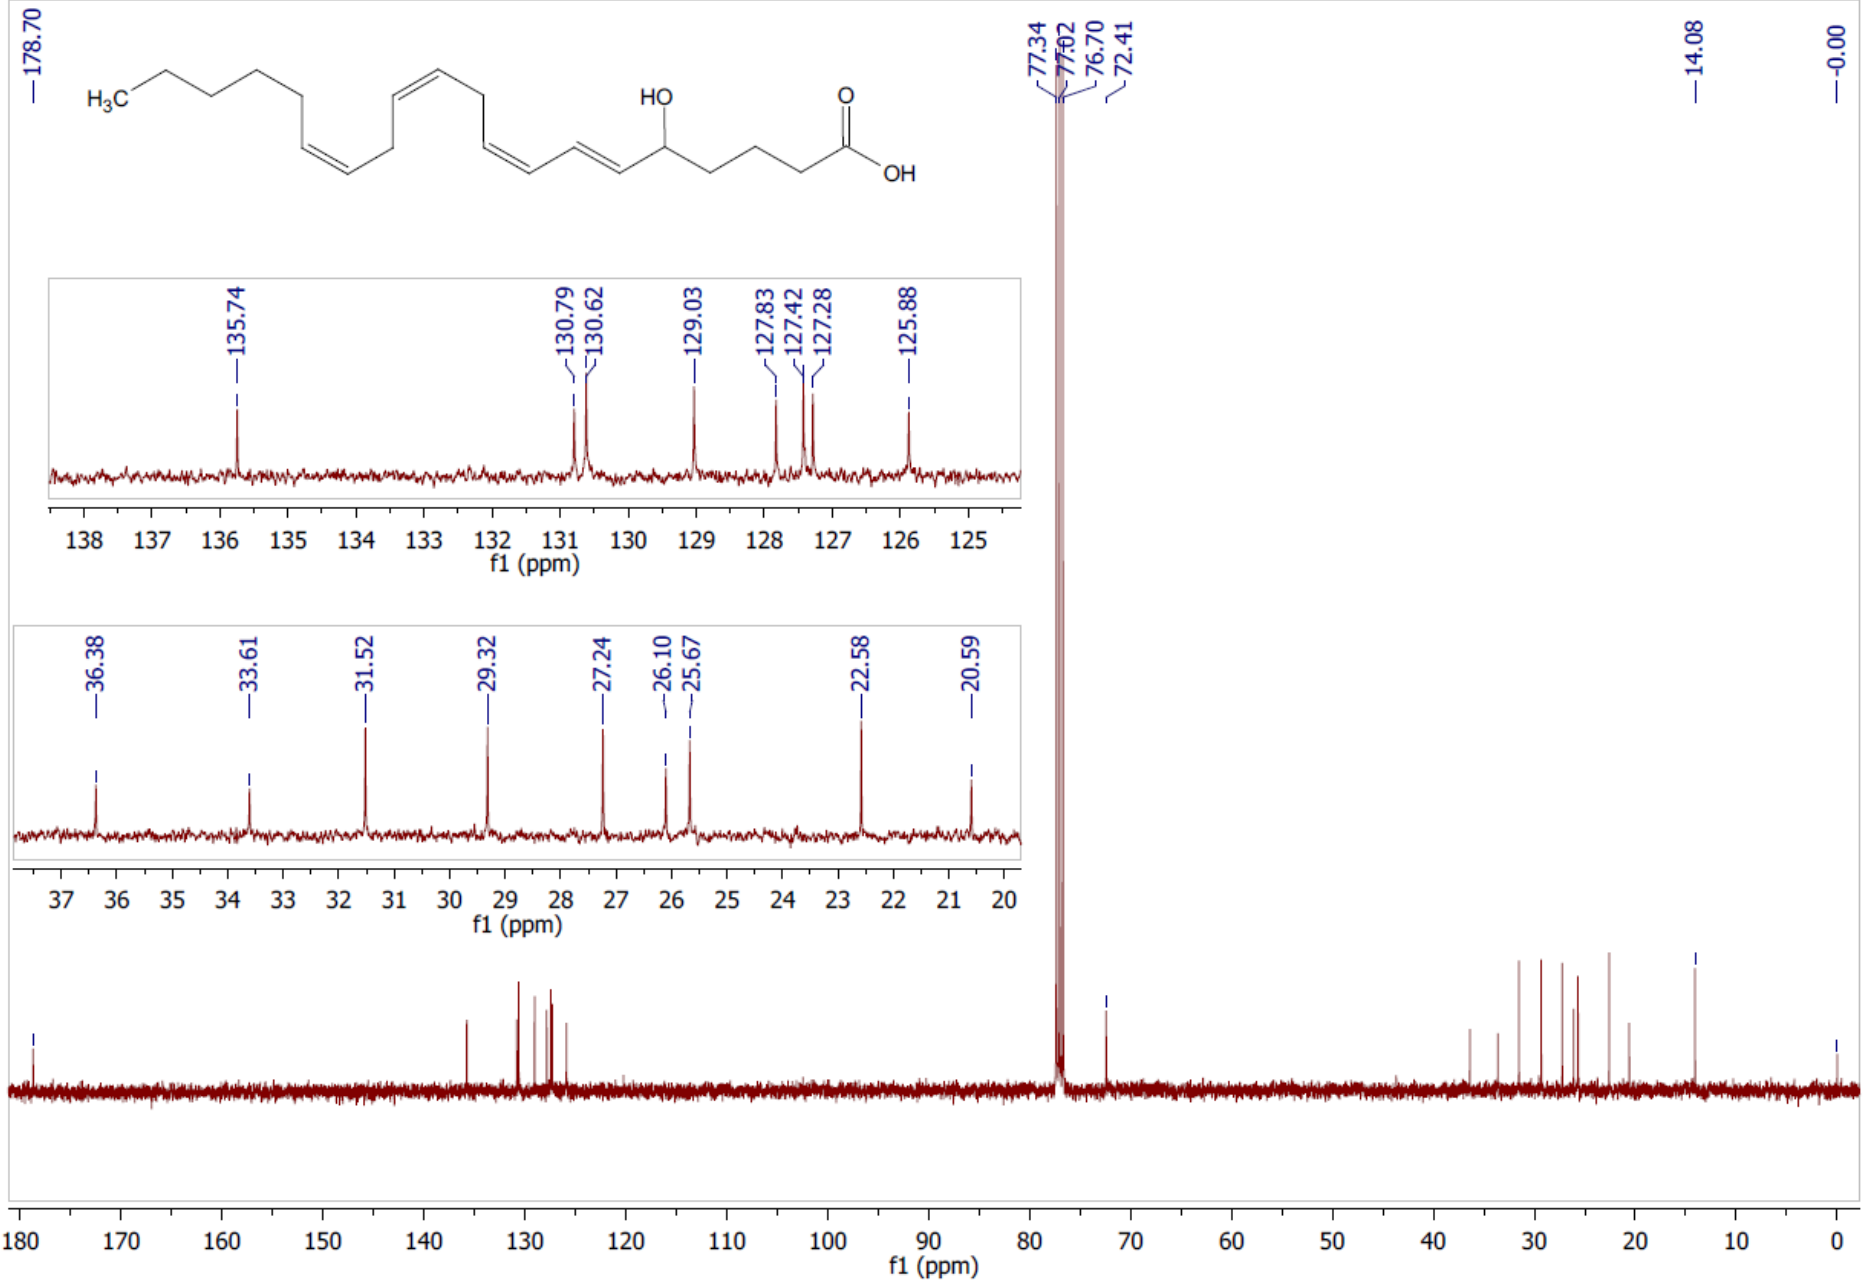

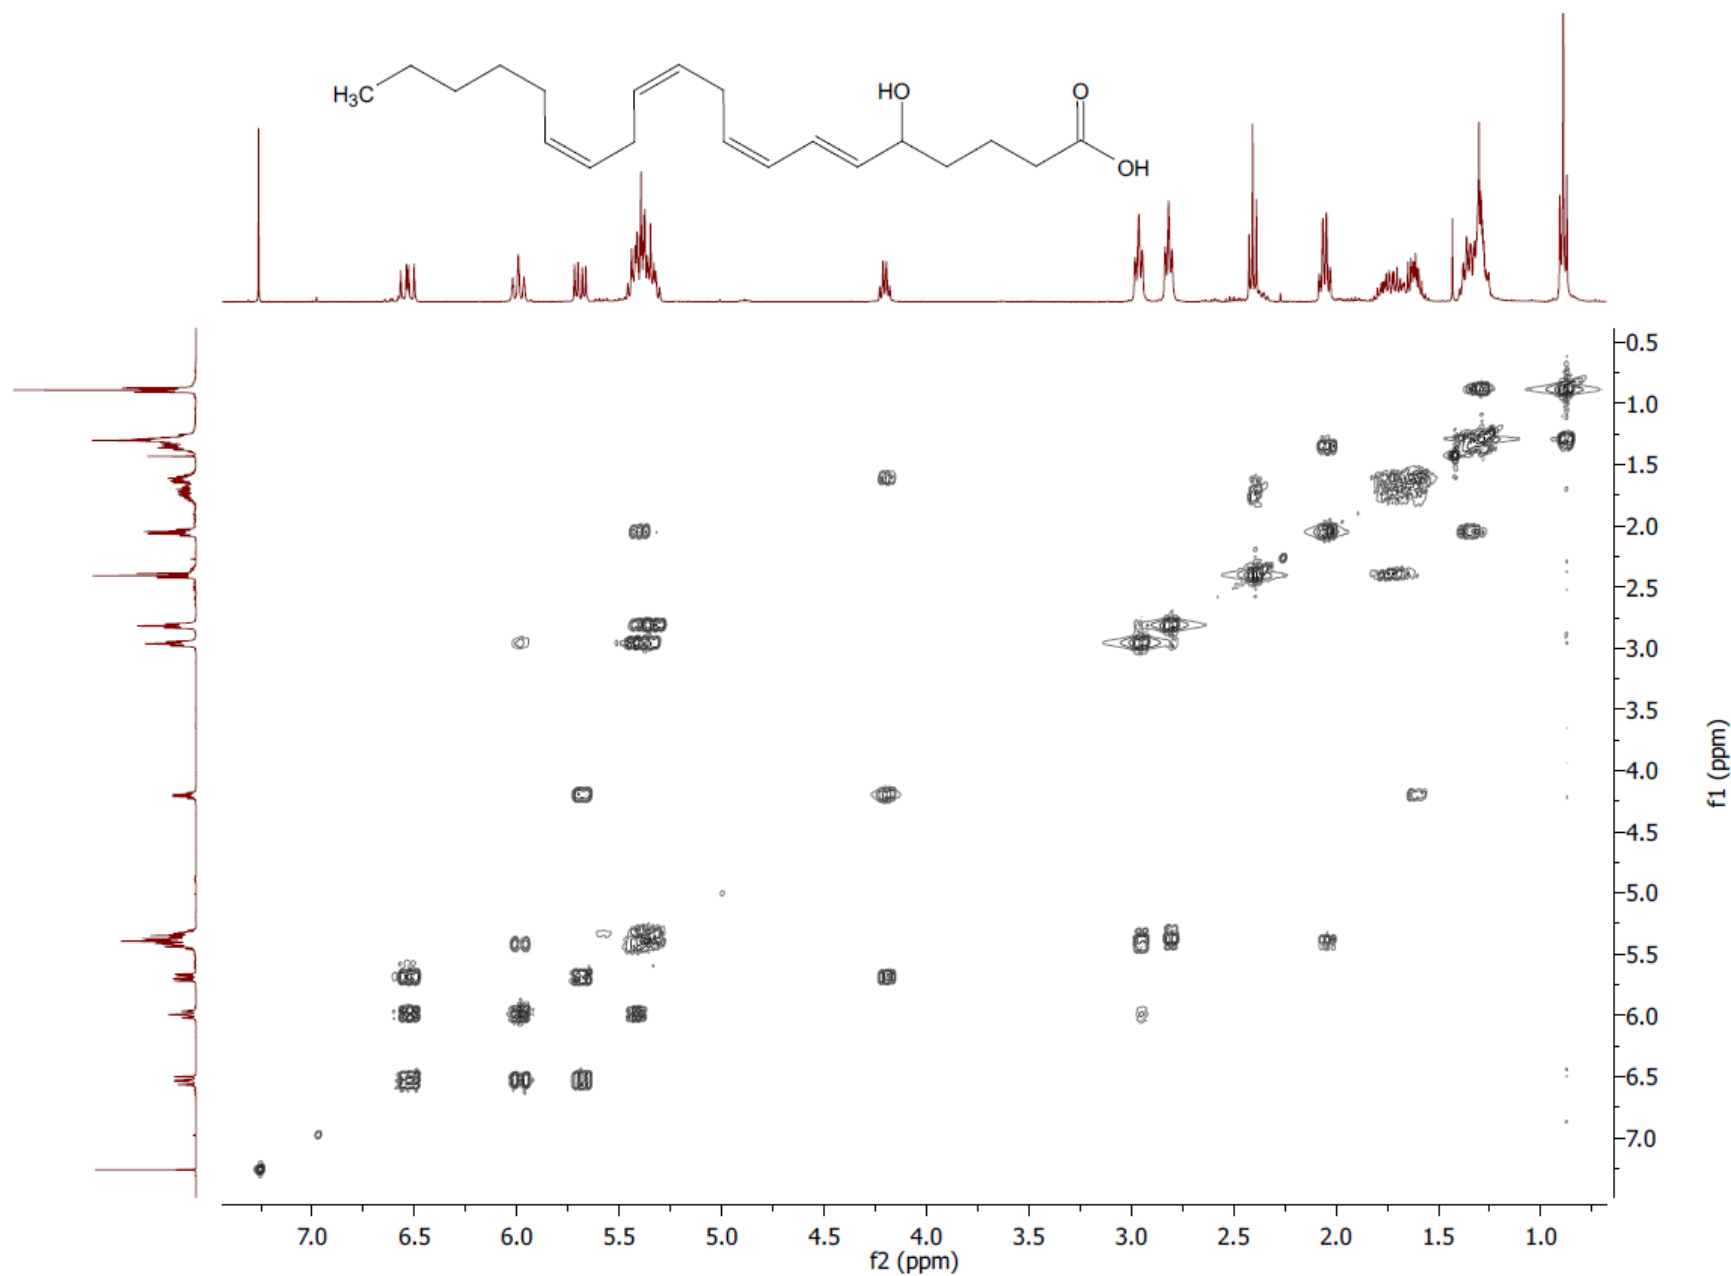

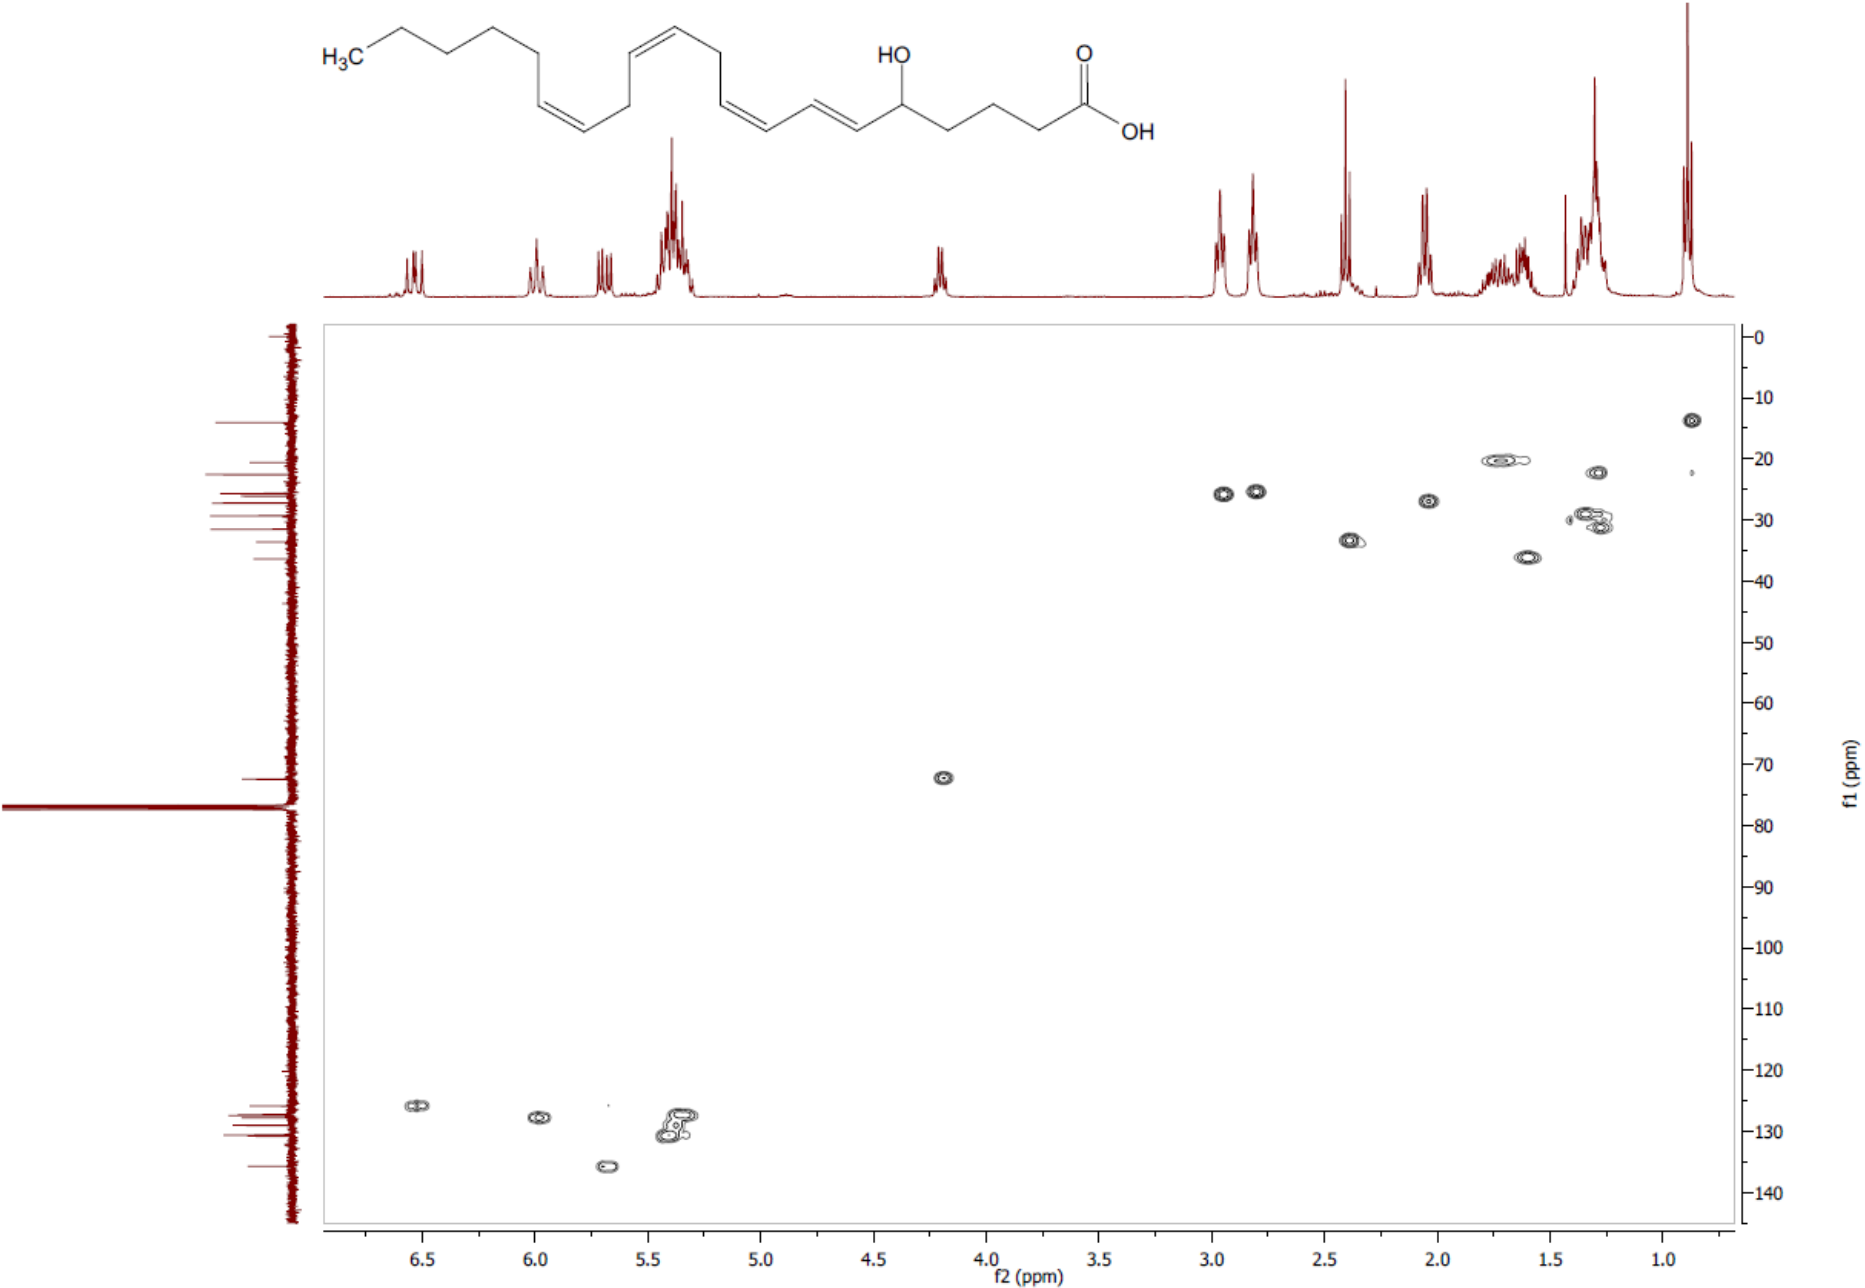

(6*E*,8*Z*,11*Z*,14*Z*)-5-Oxoicosa-6,8,11,14-tetraenoic acid (5-oxo-ETE, 1).

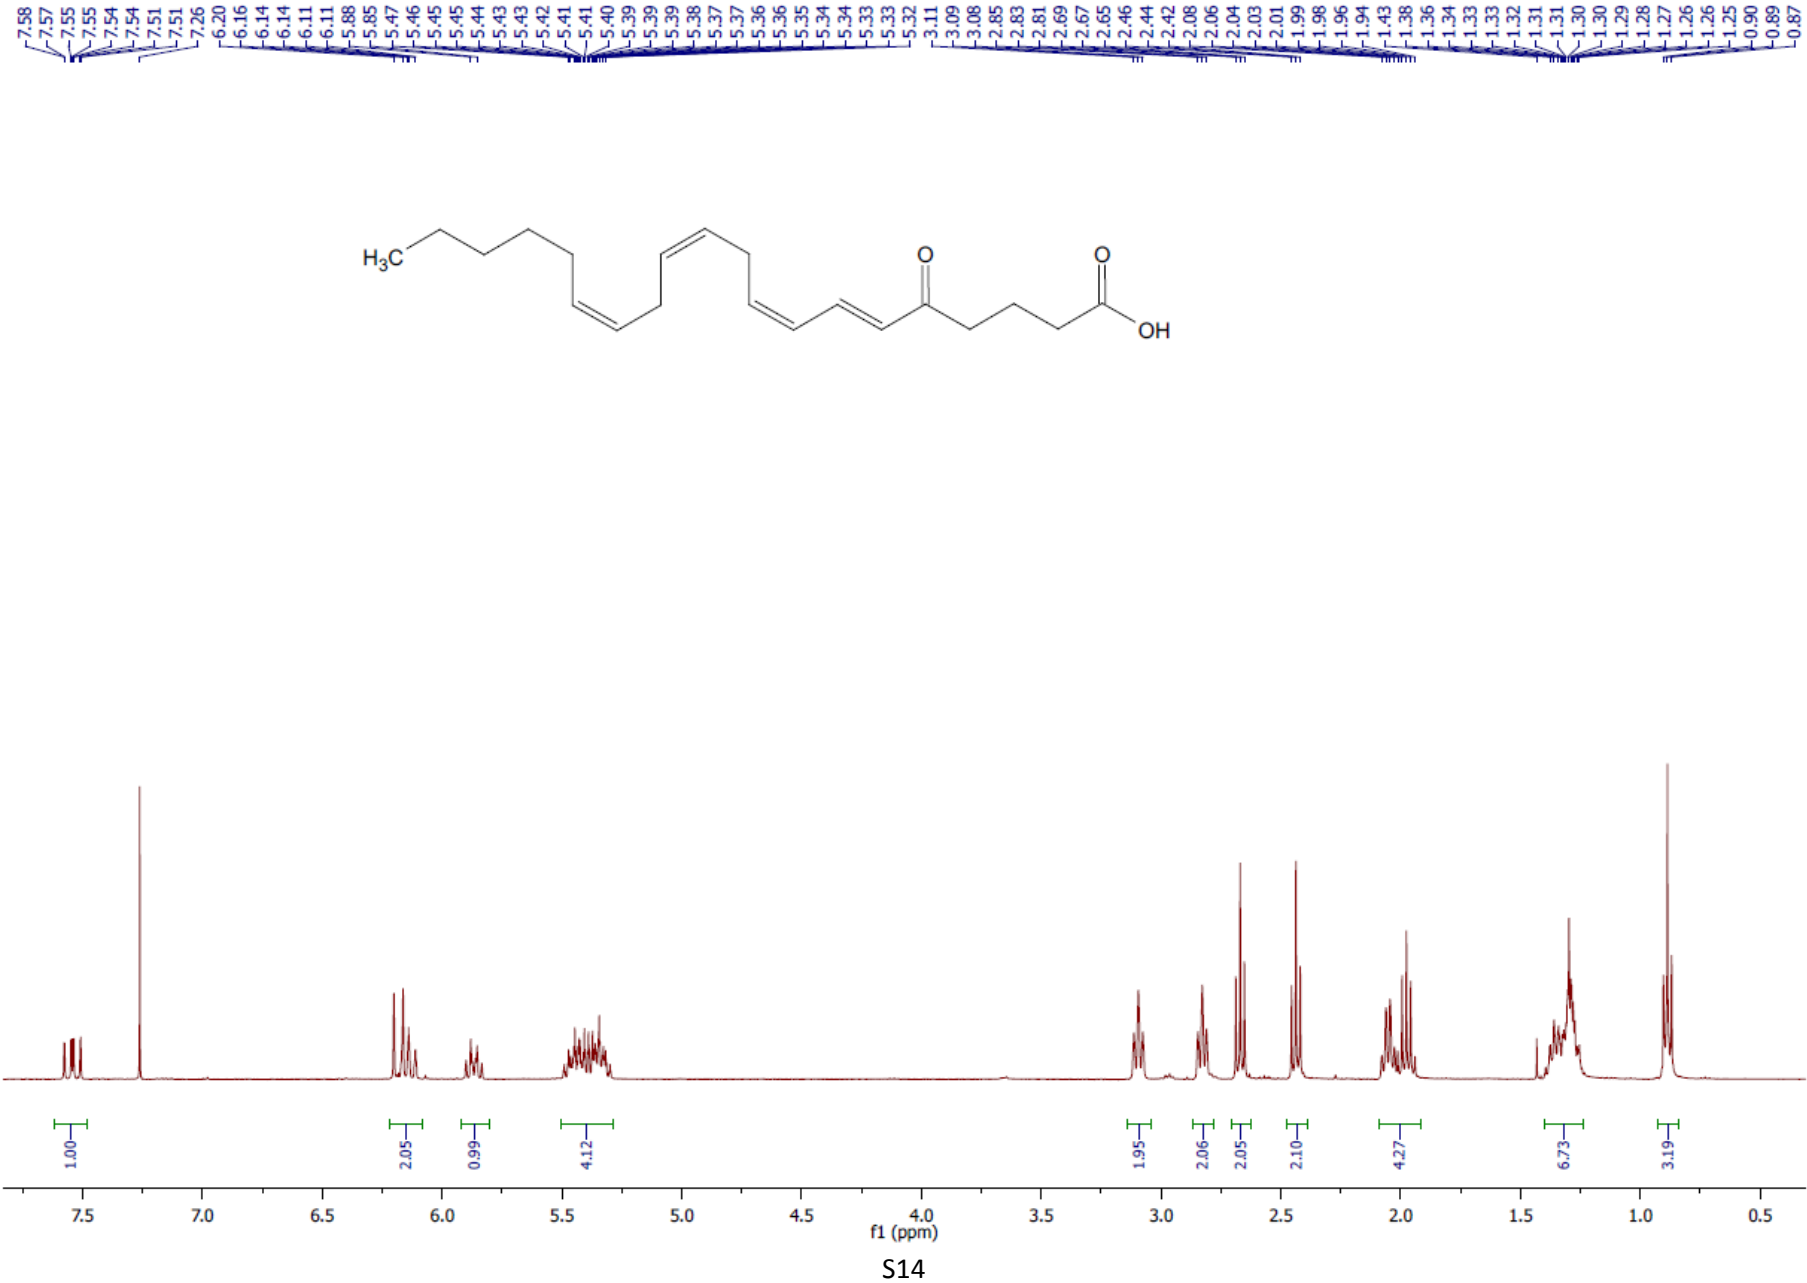

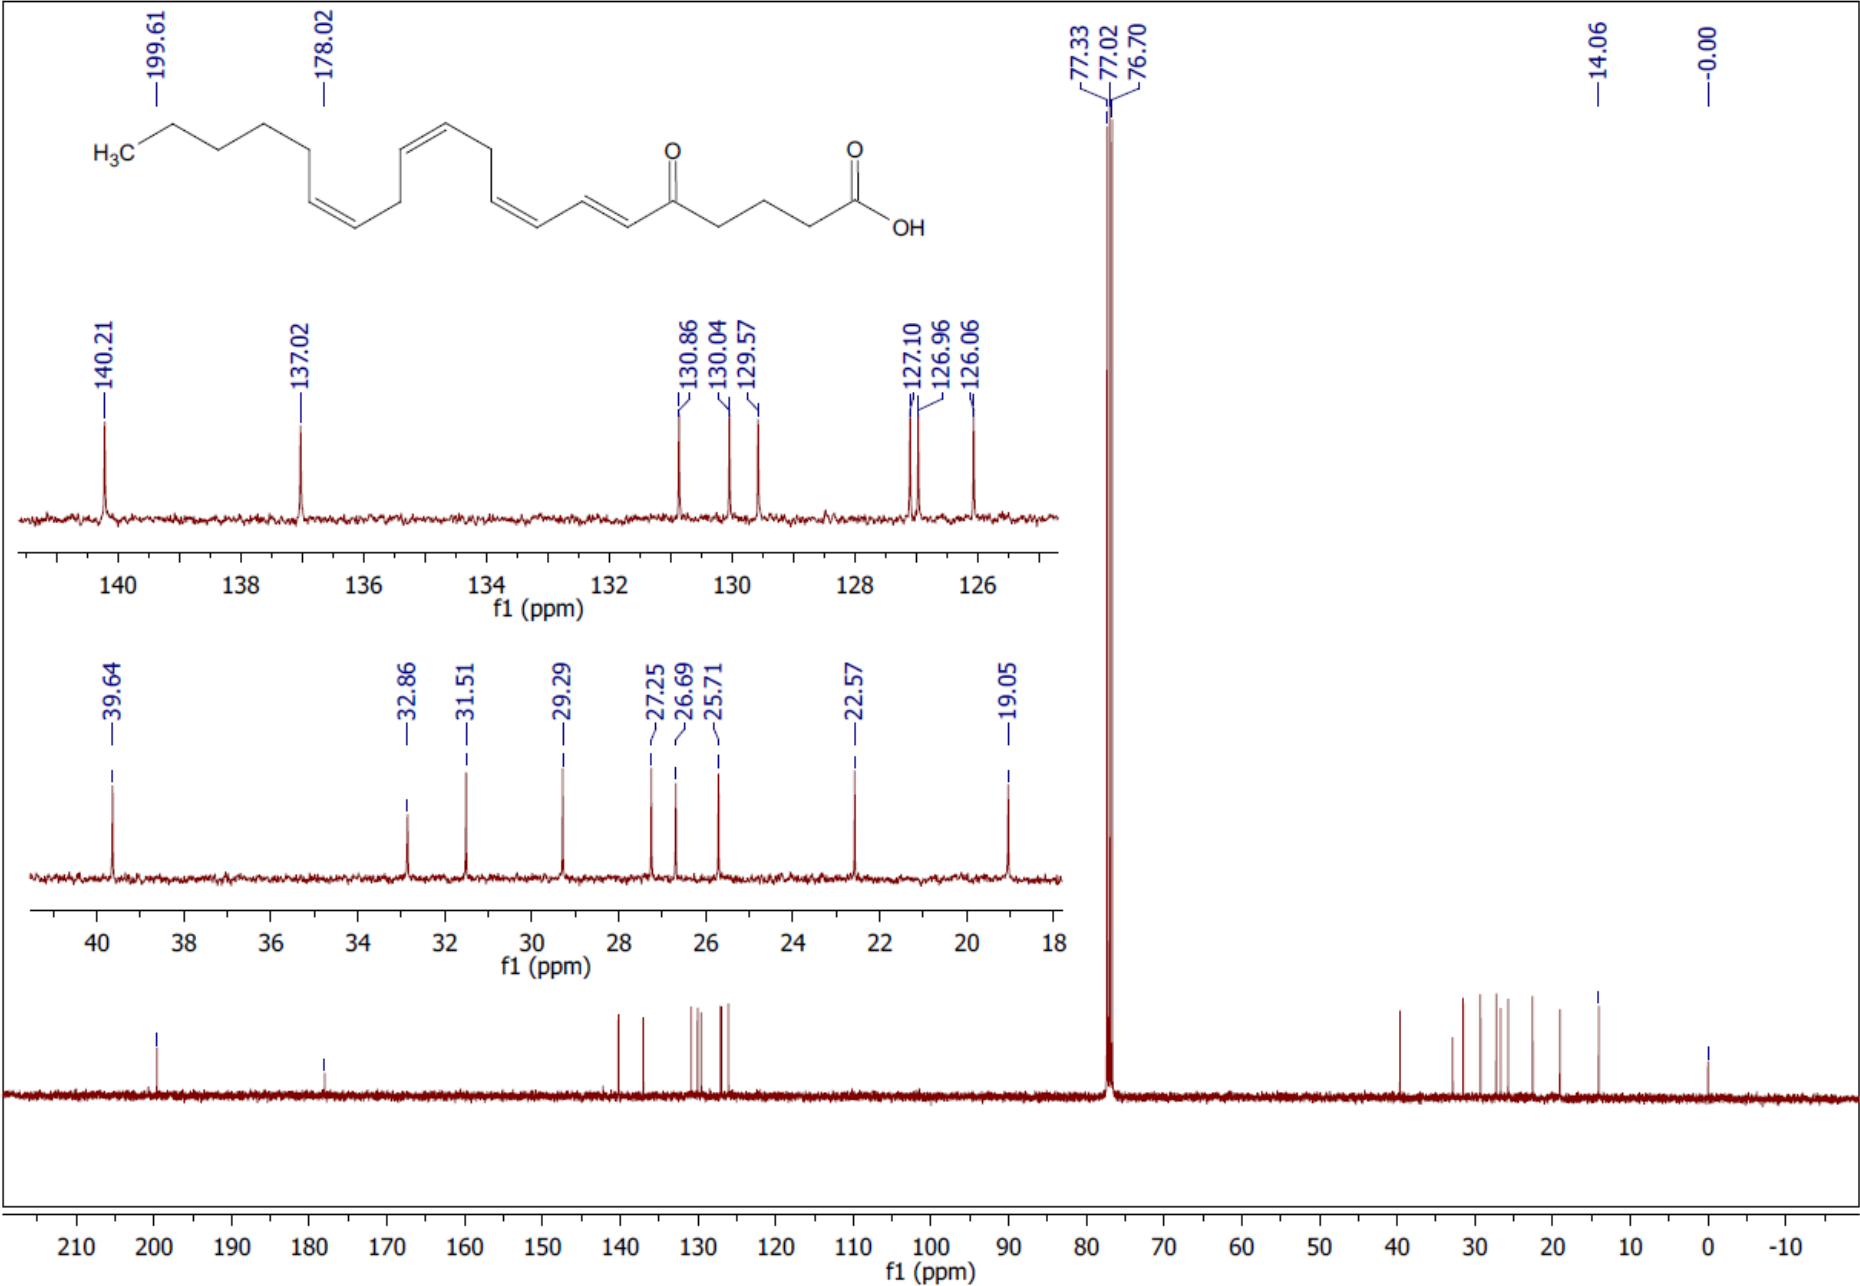

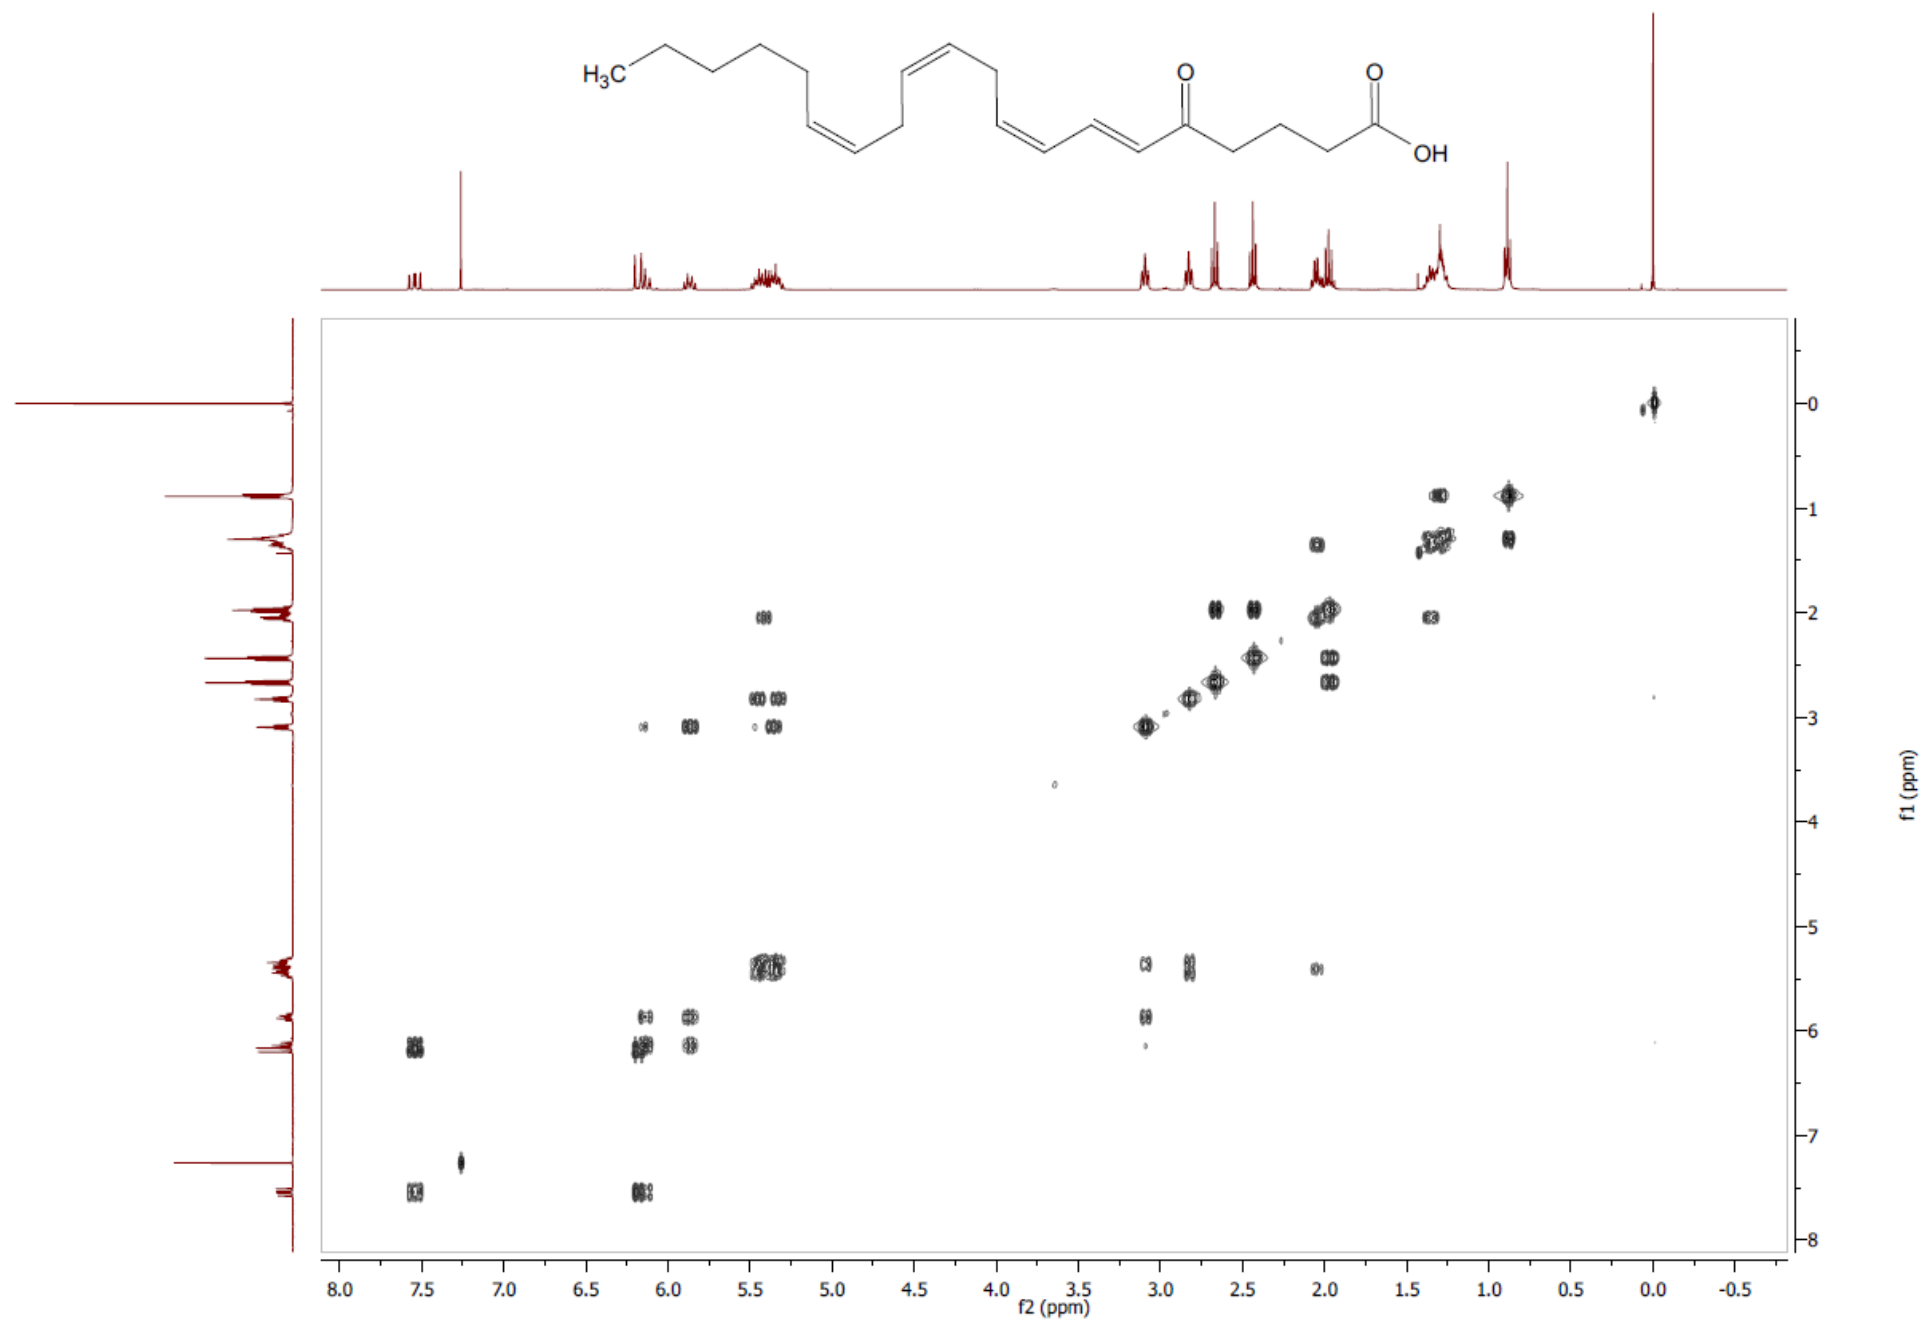



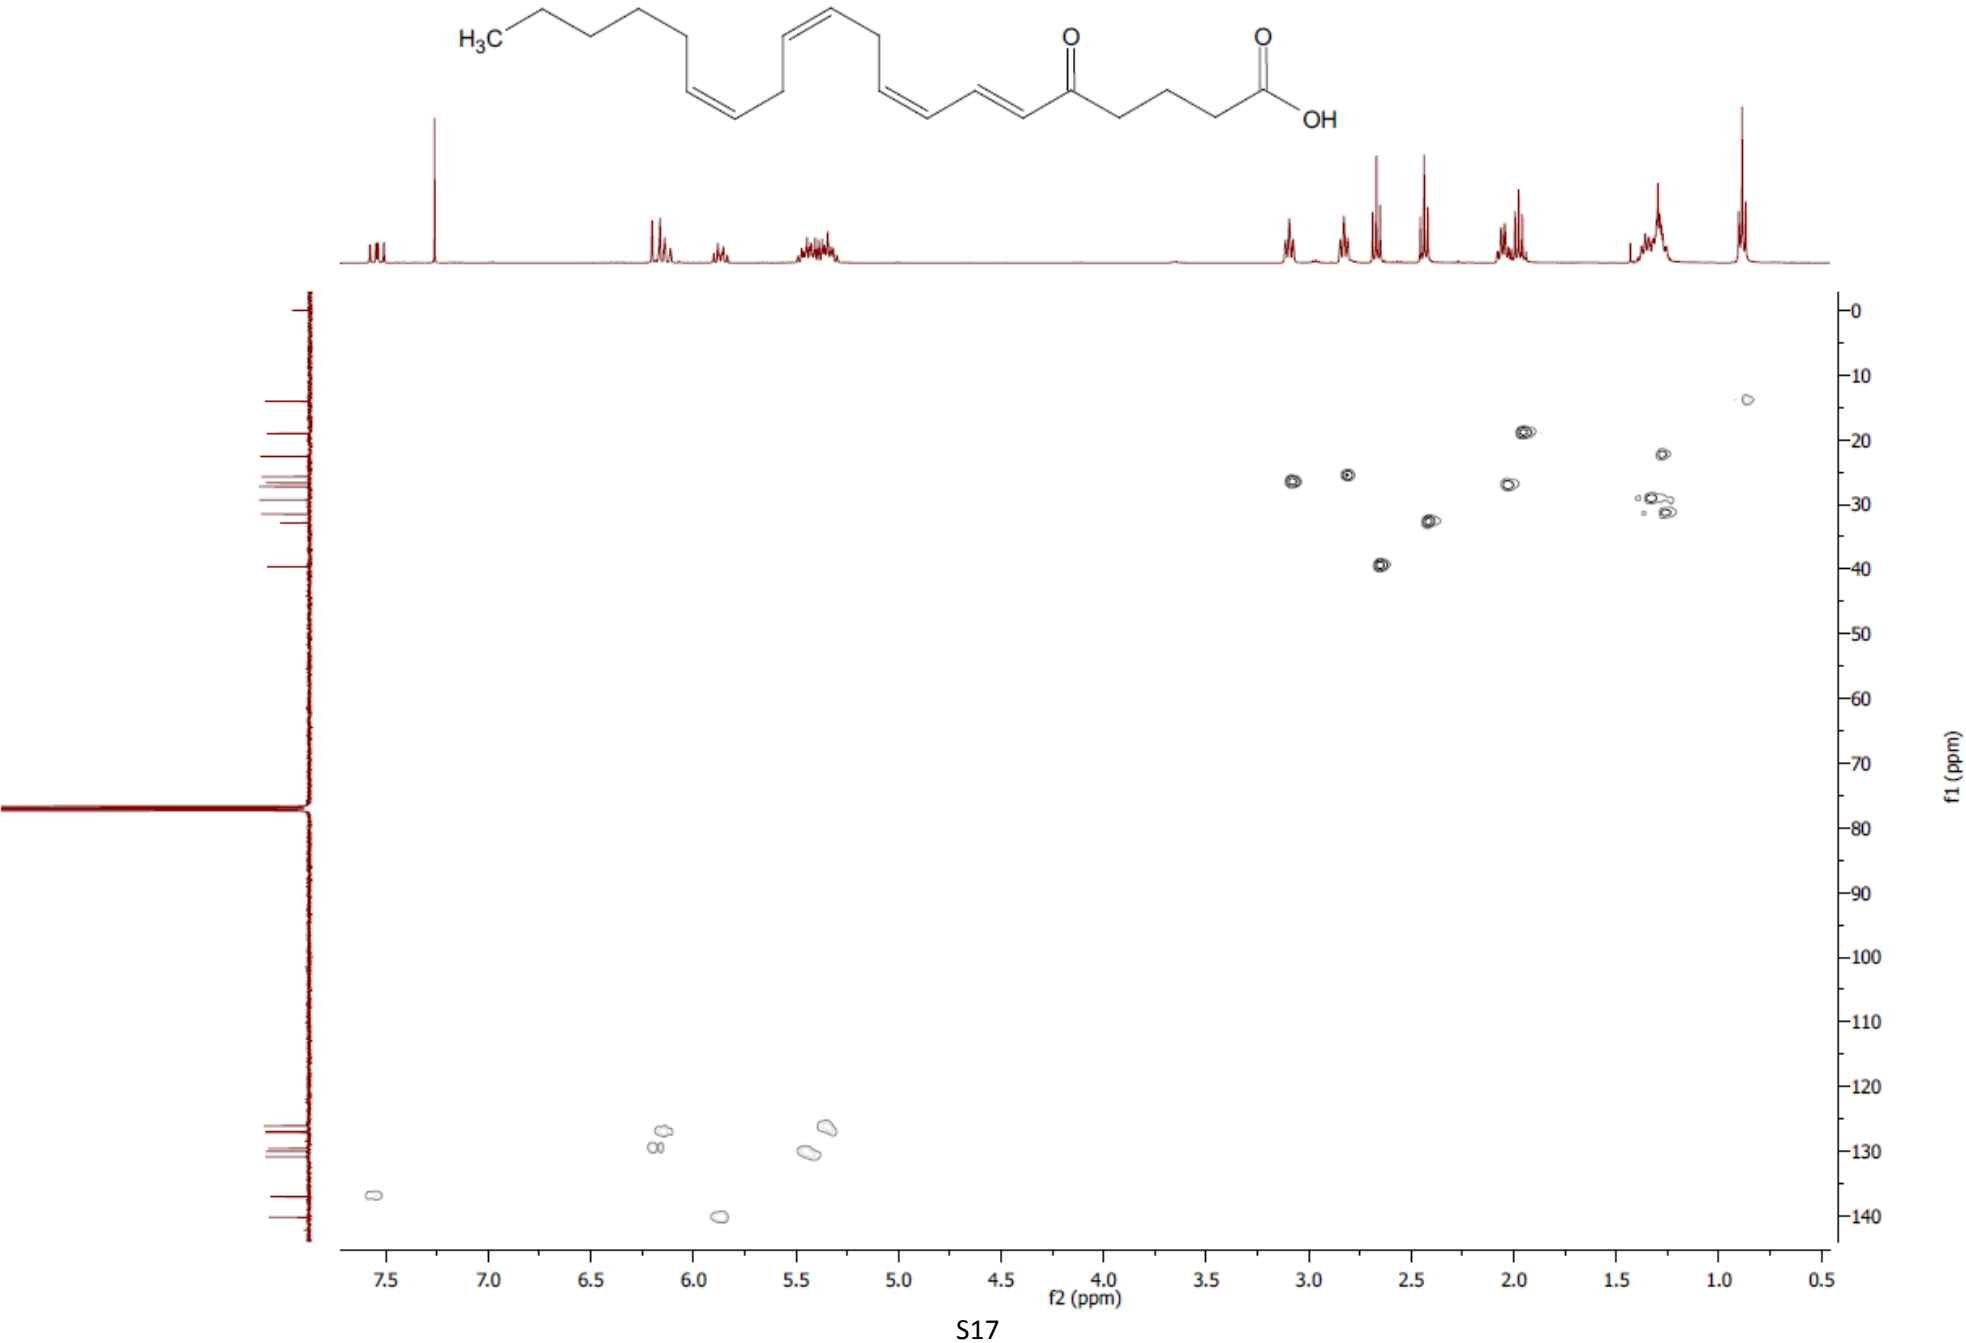

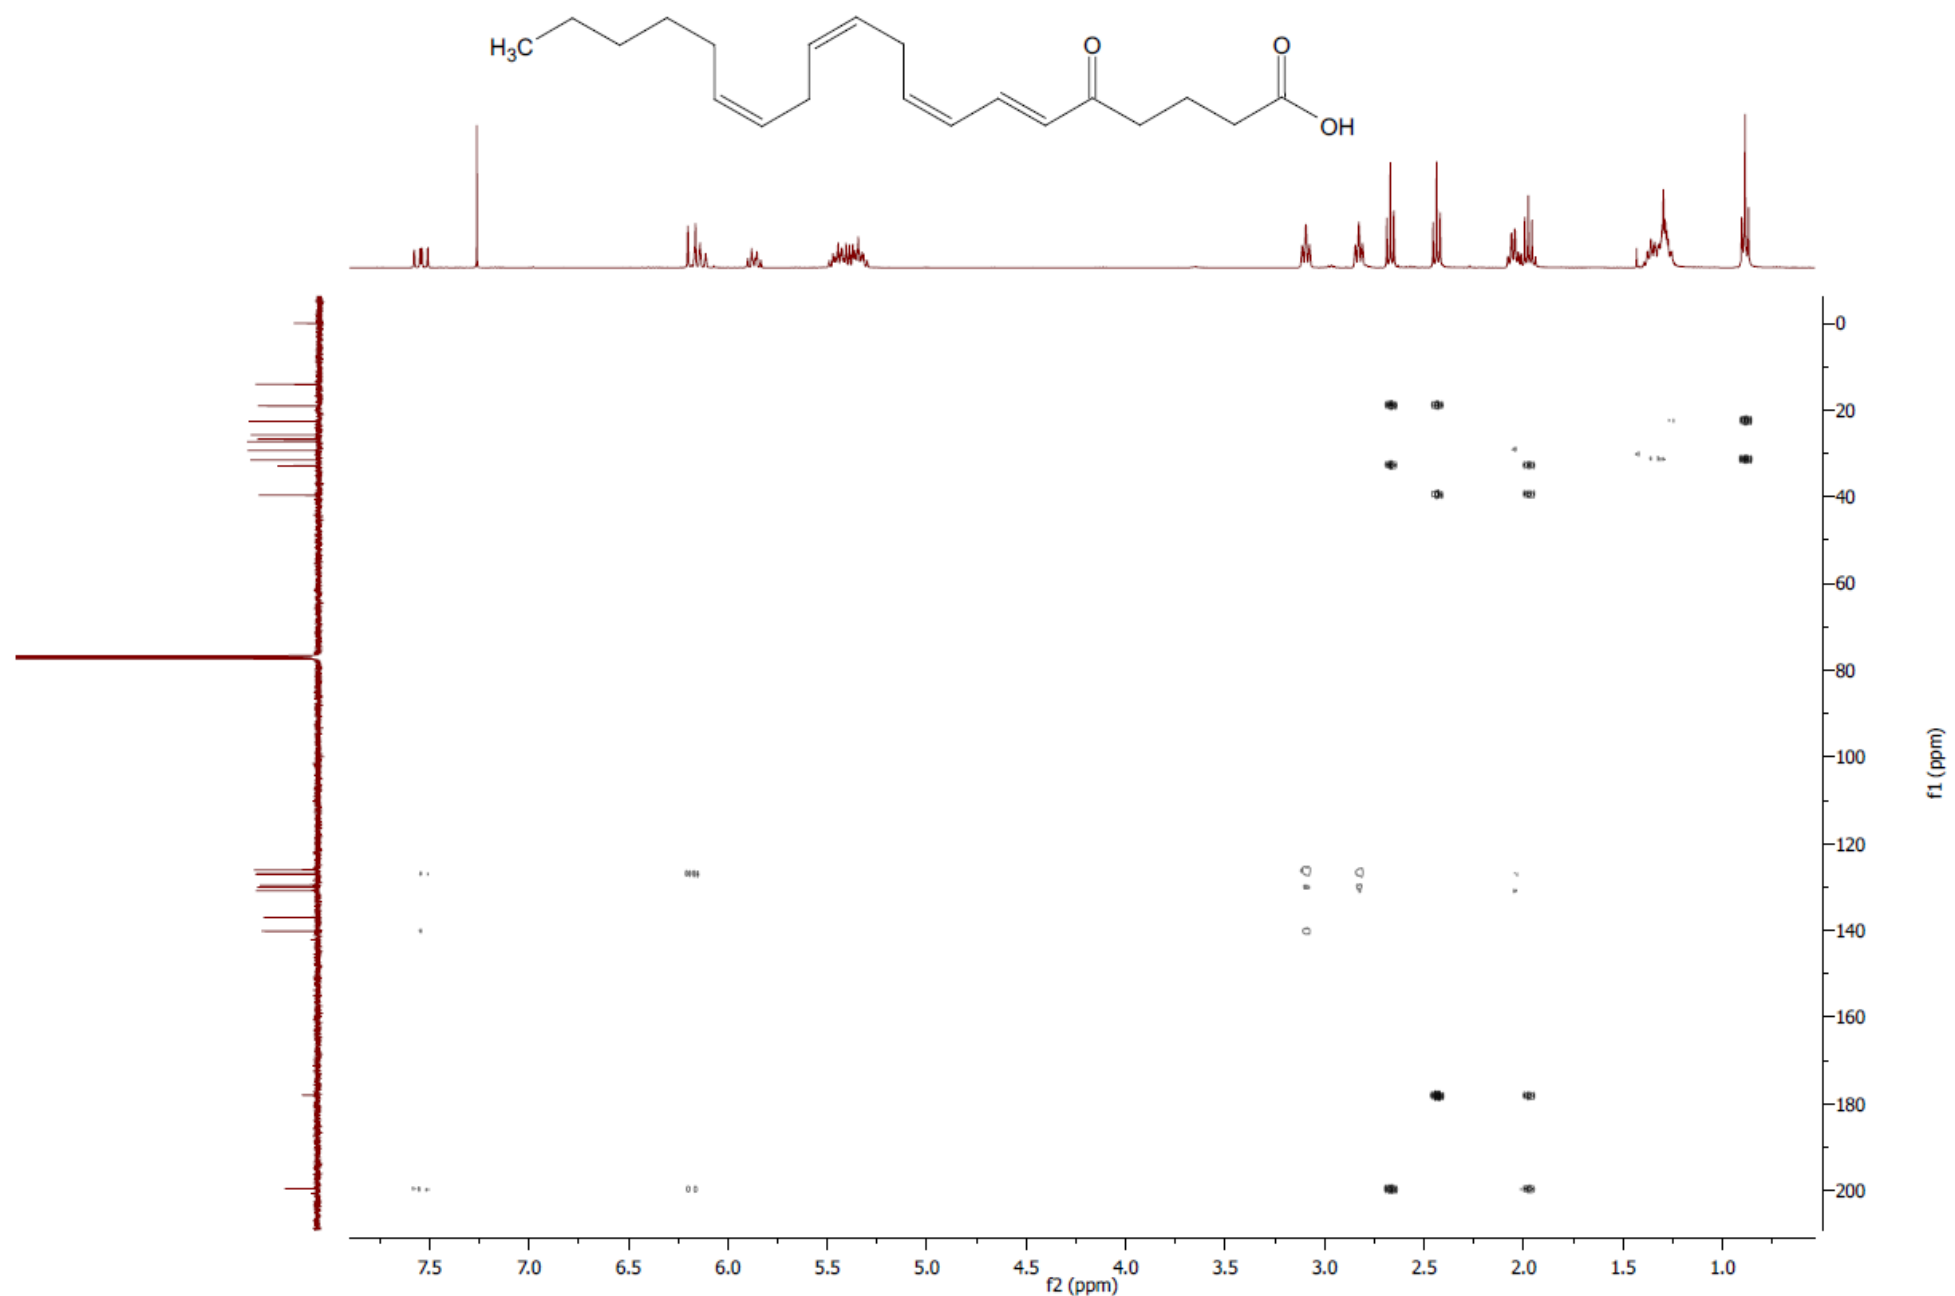

# HPLC chromatogram of 5-oxo-ETE (1).

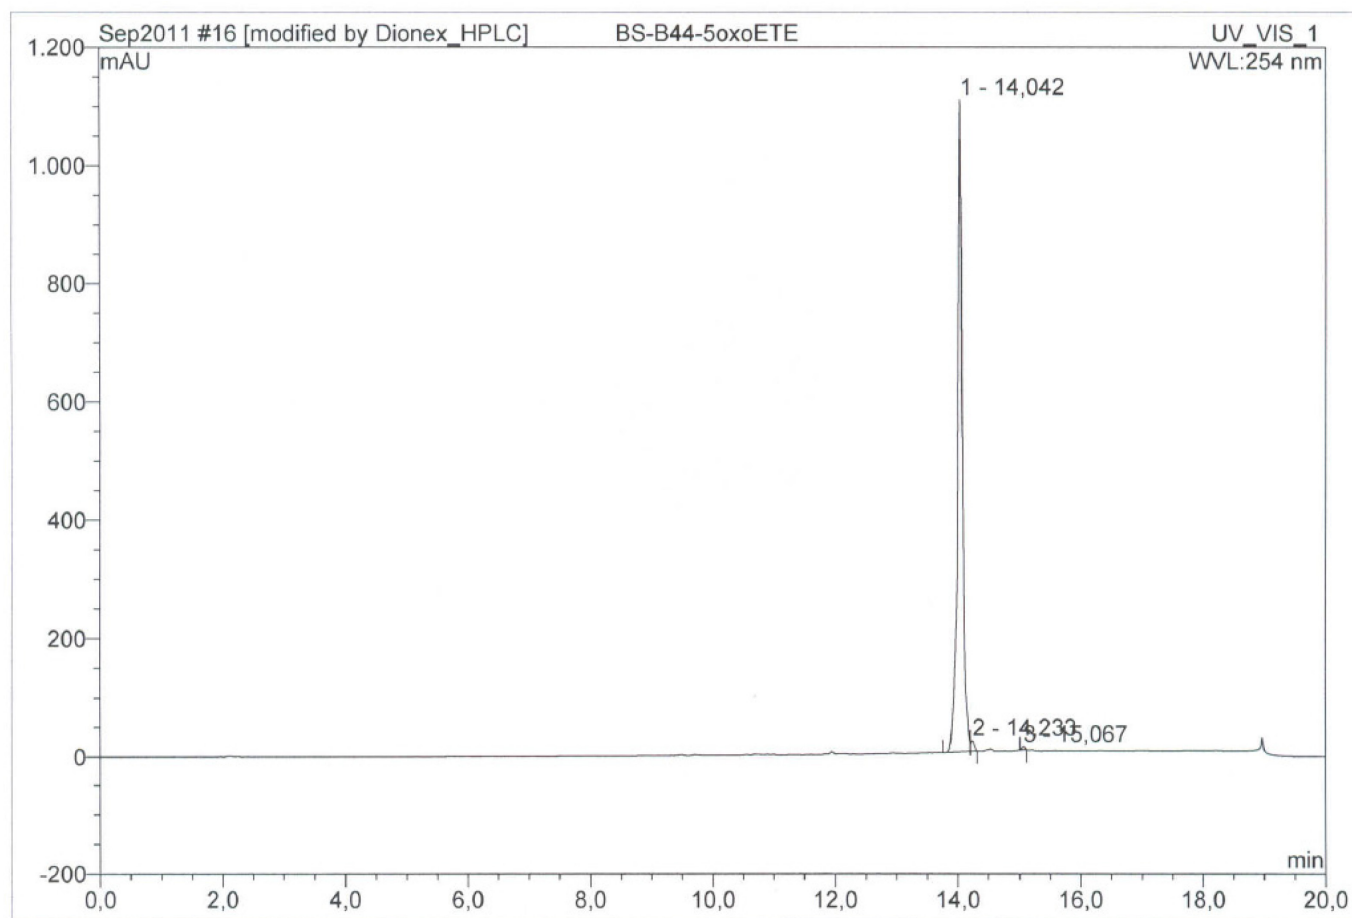

Supplement: c1md00231g.pdf [file c1md00231g.pdf]
